# Supplementary material for: Genomic Instability of the Sex-Determining Locus in Atlantic Salmon (Salmo salar)
Source: PubMed Central journal article supplement (PMC4632069; doi:10.1534/g3.115.020115), 2015-09-22
Supplement: supp_g3.115.020115_020115SI.pdf [file supp_g3.115.020115_020115SI.pdf]

## **Genomic instability of the sex-determining locus in Atlantic salmon (*Salmo salar*)**

Krzysztof P. Lubieniecki,<sup>\*</sup> Song Lin,<sup>\*</sup> Emily I. Cabana,<sup>\*</sup> Jieying Li,<sup>\*</sup> Yvonne Y.Y. Lai<sup>\*</sup> and William S. Davidson<sup>\*,1</sup>

<sup>\*</sup>Department of Molecular Biology and Biochemistry, Simon Fraser University, Burnaby, BC, V5A 1S6 Canada

<sup>1</sup>Corresponding author: Department of Molecular Biology and Biochemistry, Simon Fraser University, Burnaby, BC, V5A 1S6 Canada. E-mail: [wdavidso@sfu.ca](mailto:w davidso@sfu.ca)

```

BT_sdY -----CTCCCTT--ACTAATCATT TTTACATGAAAAAATGCATATC
AS_Tasmanian_Ssa02_sdY -----CTCCCCTTAAC TAATCATT TTTACATGAAAAAATGCATATC
AS_Tasmanian_Ssa03_sdY -----ACTCCCCTT- ACTAATCATT TTTACATGAAAAAATGCATATC
AS_European_sdY GAGAGAAACACTCCCCTTAAC TAATCATT TTTACATGAAAAAATGCATATC
AS_Tasmanian_Ssa06_sdY -----ACTCCCCTTAAC TAATCATT TTTACATGAAGAAATGCATATC
Chinook_sdY -----CTCCCCTTAAC TAATACT TTTTACATGAAAACATGCACATA
RT_sdY -----AACACTCCCCTTAAC TAATACT TTTTACATGAAAACATGCTCATA
          ***** * ***** ***** * ***** **

```

```

BT_sdY AAAAACTCCAGCGCATGTTTAAAAGCAGTCCTTAGAGGTTTTGAATCCAC
AS_Tasmanian_Ssa02_sdY AAAAACTCCAGCGCATGTTTAAAACAGTCCTTAGAGGTTTTGAATCCAC
AS_Tasmanian_Ssa03_sdY AAAAACTCCAGCGCATGTTTAAAACAGTCCTTAGAGGTTTTGAATCCAC
AS_European_sdY AAAAACTCCAGCGCATGTTTAAAACAGTCCTTAGAGGTTTTGAATCCAC
AS_Tasmanian_Ssa06_sdY AAAAACTCCAGCGCATGTTTAAAACAGTCCTTAGAGGTTTTGAATCCAC
Chinook_sdY AAAAACTCCAGCTCATGTTTAAAAGCCGTCCTTAGAATAGTTGAGTCCAT
RT_sdY AAAAACTCCAGCTCATGTTTAAAAGCCGTCCTTAGAATATTTGAGTCCAT
***** * ***** * ***** ***** **

```

```

          |                exon1                |
          |-----Exon 1F----->             |
BT_sdY   CTGCCCTTCA | ATGGCTGACAGAGAGGCCAGATTCCAAG | GTACAGAACACA
AS_Tasmanian_Ssa02_sdY CTGCCCTTCA | ATGGTTGACAGAGAGGCCAGATTCCAAG | GTACAGAACACA
AS_Tasmanian_Ssa03_sdY CTGCCCTTCA | ATGGTTGACAGAGAGGCCAGATTCCAAG | GTACAGAACACA
AS_European_sdY CTGCCCTTCA | ATGGTTGACAGAGAGGCCAGATTCCAAG | GTACAGAACACA
AS_Tasmanian_Ssa06_sdY CTGCCCTTCA | ATGGTTGACAGAGAGGCCAGATTCCAAG | GTACAGAACACA
Chinook_sdY CTGCCCTTCA | ATGGCTGACAGAGAGGCCAGAATCCAAG | GTACAGAACACA
RT_sdY   CTGCCCTTCA | ATGGCTGACAGAGAGGCCAGAATCCAAG | GTACAGAACACA
***** * ***** * ***** ***** **

```

BT\_sdY CAAATATTCAGTATGTTATCTAAGAGTGTTTTGATTTTCATTATTTTGGG  
AS\_Tasmanian\_Ssa02\_sdY CAAATATTCAGTATGTTATCTAAGAGTGTTTTGATTTTCATTATTTTGGG  
AS\_Tasmanian\_Ssa03\_sdY CAAATATTCAGTATGTTATCTAAGAGTGTTTTGATTTTCATTATTTTGGG  
AS\_European\_sdY CAAATATTCAGTATGTTATCTAAGAGTGTTTTGATTTTCATTATTTTGGG  
AS\_Tasmanian\_Ssa06\_sdY CAAATATTCAGTATGTTATCTAAGAGTGTTTTGATTTTCATTATTTTGGG  
Chinook\_sdY CAAACATTCAGTATGTTATGTAAGACTG-TTTGGTTTTTCATTATTTTGGG  
RT\_sdY CAAACATTCAGTATGTTATGTAAGACTG-TTTGGTTTTTCATTATTTTGGG  
\*\*\*\*\*

BT\_sdY CCTATGAATTTCTGATGTTAA-----GGACTGTATCTATGTGGTT  
AS\_Tasmanian\_Ssa02\_sdY CCTATGCATTTCTGATGTTGAACAGCTTAA-GGACTGTGTCTATGTGGTT  
AS\_Tasmanian\_Ssa03\_sdY CCTATGCATTTCTGATGTTGAACAGCTTAA-GGACTGTGTCTATGTGGTT  
AS\_European\_sdY CCTATGCATTTCTGATGTTGAACAG--AA-GGACTGTGTCTATGTGGTT  
AS\_Tasmanian\_Ssa06\_sdY CCTATGCATTTCTGATGTTGAACAGCTTAA-GGACTGTGTCTATGTGGTT  
Chinook\_sdY CCTATGAATGTCTGATGTTATAACAGCTTACTGTGCTGTGTACATGTGGTT  
RT\_sdY CCTATGAATGTCTGATGTTGTACAGCTTACTGTGCTGTGTATATGTGGTT  
\*\*\*\*\* \*\* \*\*\*\*\* \* \*\*\*\* \* \*\*\*\*\*

BT\_sdY ATTTCCATGTCTGATCTTTTGAGGGAAATGCTCAAAATGAGTATATAGCA  
AS\_Tasmanian\_Ssa02\_sdY ATTTCCATGTCTGATCTTTTGAGGGAAATGCTCAAAATGAGTATATAGCG  
AS\_Tasmanian\_Ssa03\_sdY ATTTCCATGTCTGATCTTTTGAGGGAAATGCTCAAAATGAGTATATAGCG  
AS\_European\_sdY ATTTCCATGTCTGATCTTTTGAGGGAAATGCTCAAAATGAGTATATAGCG  
AS\_Tasmanian\_Ssa06\_sdY ATTTCCATGTCTGATCTTTTGAGGGAAATGCTCAAAATGAGTATATAGCG  
Chinook\_sdY ATTTCCATGTCTGATTTT-----CATGTCT  
RT\_sdY ATTTCCATGTCTGA-----  
\*\*\*\*\*

```

BT_sdY          TTTTGGGAATTAG---CTTCAGTTGTACAATTTTCATTACTATAACGTTTTTTT
AS_Tasmanian_Ssa02_sdY  TTTTGGGAATTAG---CTTCAGTTGTACAATTTTCATTACTATACTTTTTTTT
AS_Tasmanian_Ssa03_sdY  TTTTGGGAATTAG---CTTCAGTTGTACAATTTTCATTACTATACTTTTTTTT
AS_European_sdY      TTTTGGGAATTAG---CTTCAGTTGTACAATTTTCATTACTATACTTTTTTTT
AS_Tasmanian_Ssa06_sdY  TTTTGGGAATTAG---CTTCAGTTGTACAATTTTCATTACTATACTTTTTTTT
Chinook_sdY        AATTGGAATGAAACTTTTCAGTTGTACAATTTTCATTACTTAACTTTTTTTT
RT_sdY           --TTGGAATGAAACTCTTCAGTTGTACAATTTTCATTATTTAACTTTTTTTT
                ***** *          ***** *          *          *          *          *

```

```

BT_sdY          GTGCTAATTTTATAATGTTTCATGTCGCAAATCTGTTATAAAAAGTCAGGA
AS_Tasmanian_Ssa02_sdY  GTGCTAATTTTATAATGTTTCATGTTGCAAATCTGTTATAAAAAGTCAGGA
AS_Tasmanian_Ssa03_sdY  GTGCTAATTTTATAATGTTTCATGTTGCAAATCTGTTATAAAAAGTCAGGA
AS_European_sdY      GTGCTAATTTTATAATGTTTCATGTTGCAAATCTGTTATAAAAAGTCAGGA
AS_Tasmanian_Ssa06_sdY  GTGCTAATTTTATAATGTTTCATGTTGCAAATCTGTTATAAAAAGTCAGGA
Chinook_sdY        GTGCTCATT-----GGATCATATCACAAATCTCTTATAAAAAGTCAGGA
RT_sdY           GTGCTCATT-----GGATCATATCACAAATCTCTTATAAAAAGTCAGGA
                ***** ***          *          *          ***** *****

```

```

BT_sdY          GCTGTTCTTCTGCGAGA---CTCATTGAAATTATTTTTTTTCTCTCTCTCC
AS_Tasmanian_Ssa02_sdY  GCTGTTCTTCTGCGGGACTGCTCATTGAAATTTTGTTTTTTCTCTCTCTCT
AS_Tasmanian_Ssa03_sdY  GCTGTTCTTCTGCGGGACTGCTCATTGAAATTTTGTTTTTTCTCTCTCTCT
AS_European_sdY      GCTGTTCTTCTGCGGAGACTGCTCATTGAAATTTTGTTTTTTCTCTCTCTCT
AS_Tasmanian_Ssa06_sdY  GCTGTTCTTCTGCGAGACTGCTCATTGAACTTTTGTTTTTTCTCTCTCTCT
Chinook_sdY        GCTGTTCTTCTGCATAACTGCTCATTGCAAGTA---TTTTTTATCTC---
RT_sdY           GCTGTTCTTCTGCATAACTGCTCATTGCAAGTATTTTTTTTTTATCTC---
                ***** *          ***** ** *          ***** *          *

```

|                        |                                                           |
|------------------------|-----------------------------------------------------------|
| BT_sdY                 | CCC-----                                                  |
| AS_Tasmanian_Ssa02_sdY | CCCTCTCTCCCCCTCTCTCTCTCTCTCTCTCTCTCTCTCTCTCCCTAACTCTC     |
| AS_Tasmanian_Ssa03_sdY | CCCTCTCTCCCC--CTCTCTCTCTCTCTCTCTCTCTCTCTCTCTCCCTAACTCTC   |
| AS_European_sdY        | CCCTCTCTCCCCA-----                                        |
| AS_Tasmanian_Ssa06_sdY | CCCTCTCTCCCC-----CCCTCTCTCTCTCTCTCTCTCTCCCTAACTCTC        |
| Chinook_sdY            | -----                                                     |
| RT_sdY                 | -----                                                     |
|                        |                                                           |
| BT_sdY                 | -----CCCTCTCTCTCTCTCTCTATTTCTCTGTCTCTCCCTAACTCTCTC        |
| AS_Tasmanian_Ssa02_sdY | TCTCTCCCTCTCTCTCTCTCTCTTTTCTCTCTCTCTCTCTCTCTCCCTCTCTCTCTC |
| AS_Tasmanian_Ssa03_sdY | TCTCTCCCTCTCTCTCTCTCTCTTTTCTCTCTCTCTCTCTCTCTCCCTCTCTCTCTC |
| AS_European_sdY        | -----CTCTCTCTCTCTCTCTCTCTCTCTCTCTCTCCCTAACTCTCTC          |
| AS_Tasmanian_Ssa06_sdY | TCTC-CCCTCTCTCTCTCTCTTTTCTCTCTCTCTCTCTCTCTCTCCCTCTCTCTC   |
| Chinook_sdY            | -----                                                     |
| RT_sdY                 | -----                                                     |
|                        |                                                           |
| BT_sdY                 | TCTCCCTCTCTCTCTCT-----CTCCC                               |
| AS_Tasmanian_Ssa02_sdY | TCTCTCTCTCTCTCTCTCTCTCTATCACTCTCCCTCTCTCTCTCTCTCTCTCCC    |
| AS_Tasmanian_Ssa03_sdY | TCTCTCTCTCTCTCTCTCTCTCTATCACTCTCCCTCTCTCTCTCTCTCTCTCCC    |
| AS_European_sdY        | TCTCCCTCTCTCTCTCT-----                                    |
| AS_Tasmanian_Ssa06_sdY | TCTCTCTCTCTCTCTCT-----CTCTCACTCTCCCTCTCTCTCTCTC           |
| Chinook_sdY            | -----                                                     |
| RT_sdY                 | -----                                                     |
|                        |                                                           |
| BT_sdY                 | TCTCTCTCTCTCTCTCTCCCTCCCTCTCTCTCTCTCTTTTCTCTCTCTCTCTCTC   |
| AS_Tasmanian_Ssa02_sdY | TCCCT--CTCTCTCTCTCTCTCTCTCTCTCTCTCTCTCTCTCTCTCTCTCTCTC    |
| AS_Tasmanian_Ssa03_sdY | TCCCTCTCTCTCTCTCTCTCTCTCTCTCTCTCTCTCTCTCTCTCTCTCTCTCTCTC  |
| AS_European_sdY        | -----CTCTCTCTCTCTCTCTCTCTCTCTC                            |
| AS_Tasmanian_Ssa06_sdY | TCCCTCCCTCTCTCTCTCTCTCTCTCTCTCTCTCTCTCTCTCTCTCTCTCTCTCTC  |
| Chinook_sdY            | -----CTCCCTCTA-----                                       |
| RT_sdY                 | -----CTCCCTCTATCTCTGTCTC                                  |

```

BT_sdY          TCCTCCCTCTCTTTCTATGTC CCTCTGTCACTCTCTCTCTCCCCAG | ----
AS_Tasmanian_Ssa02_sdY  TCCTCCCTCTCTTTCTATGTC CCTCTGTCACTCTCTCTCTCCCCAG | CCCA
AS_Tasmanian_Ssa03_sdY  TCCTCCCTCTCTTTCTATGTC CCTCTGTCACTCTCTCTCTCCCCAG | CCCA
AS_European_sdY        TCCTCCCTCTCTTTCTATGTC CCTCTGTCACTCTCTCTCTCCCCAG | CCCA
AS_Tasmanian_Ssa06_sdY  TCCTCCCTCTCTTTCTATGTC CCTCTGTCACTCTCTCTCTCCCCAG | CCCA
Chinook_sdY          -----TCTCTCCCCAG | CCCA
RT_sdY            TGTTCCCTCTGTT-----TCTCTCTCCCCAG | CCCA
                                     ***** | ****

```

```

      exon2
--Exon 2F----->

```

```

BT_sdY          GCACTCTTTTCTTGTCTCAGTGGAGTACTGCGAAGAGGAGGTGCTTAGTC
AS_Tasmanian_Ssa02_sdY  GCACTCTTTTCTTGTCTCAGTGGAGTACTGCGAAGAGGAGGTGCTTAGTC
AS_Tasmanian_Ssa03_sdY  GCACTCTTTTCTTGTCTCAGTGGAGTACTGCGAAGAGGAGGTGCTTAGTC
AS_European_sdY        GCACTCTTTTCTTGTCTCAGTGGAGTACTGCGAAGAGGAGGTGCTTAGTC
AS_Tasmanian_Ssa06_sdY  GCACTCTTTTCTTGTCTCAGTGGAGTACTGCGAAGAGGAGGTGCTTAGTC
Chinook_sdY          GCACTGTTTTTCTTGTCTCAGTGGAGTACTGCGAAGAGGAGGTGCTTAGTC
RT_sdY            GCACTGTTTTTCTTGTCTCAGTGGAGTACTGCGAAGAGGAGGTGCTTAGTC
*****

```

```

      exon2
<-----Exon 1R-

```

```

BT_sdY          ATGAGGTTATGGGGAGTGATGTCAGAATTGCCTACAAGCCCTTCTCCCTG
AS_Tasmanian_Ssa02_sdY  ATGAGGTTATGGGGAGTGATGTCAGAATTGCCTACAAGCCCTTCTCCCTG
AS_Tasmanian_Ssa03_sdY  ATGAGGTTATGGGGAGTGATGTCAGAATTGCCTACAAGCCCTTCTCCCTG
AS_European_sdY        ATGAGGTTATGGGGAGTGATGTCAGAATTGCCTACAAGCCCTTCTCCCTG
AS_Tasmanian_Ssa06_sdY  ATGAGGTTATGGGGAGTGATGTCAGAATTGCCTACAAGCCCTTCTCCCTG
Chinook_sdY          ATGAGGTCATGGGGGGTGATGTCAGAATTGCCACAAGAC---CTCCCTA
RT_sdY            ATGAGGTCATGGGGGGTGATGTCAGAATTGCCACAAGAC---CTCCCTA
*****

```

exon2

-----

```
BT_sdY ATGATGGATGGGATCCCCGTCATCTCTCTCCCAAAGCCCCCGACACCAT
AS_Tasmanian_Ssa02_sdY ATGATGGATGGCATCCCCGTCATCTCTCTCCCAAAGCCCCCGACACCAT
AS_Tasmanian_Ssa03_sdY ATGATGGATGGCATCCCCGTCATCTCTCTCCCAAAGCCCCCGACACCAT
AS_European_sdY ATGATGGATGGGATCCCCGTCATCTCTCTCTCCCAAAGCCCCCGACACCAT
AS_Tasmanian_Ssa06_sdY ATGATGGATGGGATCCCCGTCATCTCTCTCCCAAAGCCCCCGACACCAT
Chinook_sdY ATGATGGATGGGATCCCCTTCATTTCTCTCTCCCAAAGCCCCCAACACCCT
RT_sdY ATGATGGATGGGATCCCCTTCATCTCTCTCTCCCAAAGCCCCCAACACCCT
***** * * * * * * * * * * * * * * * * * * * * * * * * * * * * *
```

exon2

```
BT_sdY TCCCATCTCCTCTGACCGTTCAACCCTCTCCAACCTGCTTTCCCTCATGG
AS_Tasmanian_Ssa02_sdY TCCCATCTCCTCTGACCGTTCAATCCTCTCCAACCTGCTTTCCCTCATGG
AS_Tasmanian_Ssa03_sdY TCCCATCTCCTCTGACCGTTCAATCCTCTCCAACCTGCTTTCCCTCATGG
AS_European_sdY TCCCATCTCCTCTGACCGTTCAATCCTCTCCAACCTGCTTTCCCTCATGG
AS_Tasmanian_Ssa06_sdY TCCCATCTCCTCTGACCGTTCAATCCTCTCCAACCTGCTTTCCCTCATGG
Chinook_sdY TCCTATCTCCTCTGATCGTTCAATCCTCTCCAACCTGTTGTCCCTCATGG
RT_sdY TCCTATCTCCTCTGATCGTTCAATCCTCTCCAACCTGTTGTCCCTCATGG
*** * * * * * * * * * * * * * * * * * * * * * * * * * * * * *
```

exon2

```
BT_sdY AGGGTGGAGTGGTTTTAAGCTCTAGGGAGGAAGGCATCTATGCTGAACGG
AS_Tasmanian_Ssa02_sdY AGGGTGGAGTGGTTTTAAGCTCTAAGGAGGAAGGCATCTATGCTGAACGG
AS_Tasmanian_Ssa03_sdY AGGGTGGAGTGGTTTTAAGCTCTAAGGAGGAAGGCATCTATGCTGAACGG
AS_European_sdY AGGGTGGAGTGGTTTTAAGCTCTAAGGAGGAAGGCATCTATGCTGAACGG
AS_Tasmanian_Ssa06_sdY AGGGTGGAGTGGTTTTAAGCTCTAAGGAGGAAGGCATCTATGCTGAACGG
Chinook_sdY AGGGTGGAGTAGTTTTAAGCTCTAGGGAGGAAGGTATCTATGCTGAACGG
RT_sdY AGGGTGGAGTGGTTTTAAGCTCTAGGGAGGAAGGTATCTATGCTGAACGG
***** * * * * * * * * * * * * * * * * * * * * * * * * * * * * *
```

```

                exon2
BT_sdY          CATAGCCAAGCCATAGTCTCCTGGATGGGCGGCACGGGGGATGAGATGCA
AS_Tasmanian_Ssa02_sdY  CATAGCCAAGCCATAGTCTCCTGGATGGGCGGCACGGGGGATGAGATGCA
AS_Tasmanian_Ssa03_sdY  CATAGCCAAGCCATAGTCTCCTGGATGGGCGGCACGGGGGATGAGATGCA
AS_European_sdY        CATAGCCAAGCCATAGTCTCCTGGATGGGCGGCACGGGGGATGAGATGCA
AS_Tasmanian_Ssa06_sdY  CATAGCCAAGCCATAGTCTCCTGGATGGGCGGCACGGGGGATGAGATGCA
Chinook_sdY          CATAGCCAAGCCACAGTCTCCTGGATGGGTGGCACC GGAGATGAGATGCA
RT_sdY            CATAGCCAAGCCACAGTCTCCTGGATGGGTGGCACC GGAGATGAGATGCA
                ***** ** *****

```

```

                exon2
                <--Exon 2R-
BT_sdY          CGTGATGGAGCGTGATGTGGATCCTGTGATGCTCTTCAACAGGGAGACCT
AS_Tasmanian_Ssa02_sdY  CGTGATGGAGCGTGATGTGGATCCTGTGATGCTCTTCAACAGGGAGACCT
AS_Tasmanian_Ssa03_sdY  CGTGATGGAGCGTGATGTGGATCCTGTGATGCTCTTCAACAGGGAGACCT
AS_European_sdY        CGTGATGGAGCGTGATGTGGATCCTGTGATGCTCTTCAACAGGGAGACCT
AS_Tasmanian_Ssa06_sdY  CGTGATGGAGCGTGATGTGGATCCTGTGATGCTCTTCAACAGGGAGACCT
Chinook_sdY          CGTGATGGACCGTGATGTGGACCCTGTGATGCTCTTCAACAGAGAGACCT
RT_sdY            CGTGATGGAGCGTGATGTGGACCCTGTGATGCTCTTCAACAGAGAGCACT
                ***** ** *****

```

```

-----|
BT_sdY   TCAGACAGG | GTGAGTGA -----
AS_Tasmanian_Ssa02_sdY  TCAGACAGG | GTGAGTGA -----
AS_Tasmanian_Ssa03_sdY  TCAGACAGG | GTGAGTGA -----
AS_European_sdY        TCAGACAGG | GTGAGTGA -----
AS_Tasmanian_Ssa06_sdY  TCAGACAGG | GTGAGTGA -----
Chinook_sdY          TCAGACAGG | GTGAGTGAACCTGTTAGTGGTAAATTCTAATGATTCTTGAA
RT_sdY            TCAGACAGG | GTGAGTGAATCTGTTAGTGGTAAATTCTAATGATTCTTGAA
                *****

```



BT\_sdY -----  
AS\_Tasmanian\_Ssa02\_sdY -----  
AS\_Tasmanian\_Ssa03\_sdY -----  
AS\_European\_sdY -----  
AS\_Tasmanian\_Ssa06\_sdY -----  
Chinook\_sdY GAGCATAACTTATAATAGGGAGGATGTTCCCTCGGGGGGATCAAATCAGC  
RT\_sdY GAGCATAACTTATAATAG-----

BT\_sdY -----  
AS\_Tasmanian\_Ssa02\_sdY -----  
AS\_Tasmanian\_Ssa03\_sdY -----  
AS\_European\_sdY -----  
AS\_Tasmanian\_Ssa06\_sdY -----  
Chinook\_sdY GGGTAGTCAGCGGATATTTTAGAGCGTCACTGATCGTTTTTCGATAAAAT  
RT\_sdY -----

BT\_sdY -----  
AS\_Tasmanian\_Ssa02\_sdY -----  
AS\_Tasmanian\_Ssa03\_sdY -----  
AS\_European\_sdY -----  
AS\_Tasmanian\_Ssa06\_sdY -----  
Chinook\_sdY TCAAACCTTTCATTAAAACACACATGCAAGGTATTGAATTAAAGCTACACT  
RT\_sdY -----

BT\_sdY -----  
AS\_Tasmanian\_Ssa02\_sdY -----  
AS\_Tasmanian\_Ssa03\_sdY -----  
AS\_European\_sdY -----  
AS\_Tasmanian\_Ssa06\_sdY -----  
Chinook\_sdY CGTTGTGAATCTAGTCAGATTTGTAAAATGCTTTTCGGCGAAAGCATGAG  
RT\_sdY -----

BT\_sdY -----  
AS\_Tasmanian\_Ssa02\_sdY -----  
AS\_Tasmanian\_Ssa03\_sdY -----  
AS\_European\_sdY -----  
AS\_Tasmanian\_Ssa06\_sdY -----  
Chinook\_sdY AAGCTATTATCTGATAGCATGTAACACCCCAAAAGACCCGTAGAGGATGT  
RT\_sdY -----

BT\_sdY -----  
AS\_Tasmanian\_Ssa02\_sdY -----  
AS\_Tasmanian\_Ssa03\_sdY -----  
AS\_European\_sdY -----  
AS\_Tasmanian\_Ssa06\_sdY -----  
Chinook\_sdY AAACAAAATAATTAGCGTAGTCGGCGCTACACAAACCGCACAATAAAAT  
RT\_sdY -----

BT\_sdY -----  
AS\_Tasmanian\_Ssa02\_sdY -----  
AS\_Tasmanian\_Ssa03\_sdY -----  
AS\_European\_sdY -----  
AS\_Tasmanian\_Ssa06\_sdY -----  
Chinook\_sdY ATAAAACATTCATTACCTTTGACCATCTTCTTTCTTGGCACTCCTTGATG  
RT\_sdY -----

BT\_sdY -----  
AS\_Tasmanian\_Ssa02\_sdY -----  
AS\_Tasmanian\_Ssa03\_sdY -----  
AS\_European\_sdY -----  
AS\_Tasmanian\_Ssa06\_sdY -----  
Chinook\_sdY TCCCATAATCAATACTGGGTCTTTTTTTGGATTAAATCGGTCCATATATA  
RT\_sdY -----

BT\_sdY -----  
AS\_Tasmanian\_Ssa02\_sdY -----  
AS\_Tasmanian\_Ssa03\_sdY -----  
AS\_European\_sdY -----  
AS\_Tasmanian\_Ssa06\_sdY -----  
Chinook\_sdY GCCTAGATATCGATCTATGAAGACTGTGTGATAAACGGAAAAAATAGCG  
RT\_sdY -----

BT\_sdY -----  
AS\_Tasmanian\_Ssa02\_sdY -----  
AS\_Tasmanian\_Ssa03\_sdY -----  
AS\_European\_sdY -----  
AS\_Tasmanian\_Ssa06\_sdY -----  
Chinook\_sdY TTTCATAACGTAACGTCATTTTTTAAAAGTTAAAAGTCGACGATAAACT  
RT\_sdY -----

BT\_sdY -----  
AS\_Tasmanian\_Ssa02\_sdY -----  
AS\_Tasmanian\_Ssa03\_sdY -----  
AS\_European\_sdY -----  
AS\_Tasmanian\_Ssa06\_sdY -----  
Chinook\_sdY TTCACAAAACACTTCGAAATACCTTTCTAATGCAACTTTAGGTATTACTA  
RT\_sdY -----

BT\_sdY -----  
AS\_Tasmanian\_Ssa02\_sdY -----  
AS\_Tasmanian\_Ssa03\_sdY -----  
AS\_European\_sdY -----  
AS\_Tasmanian\_Ssa06\_sdY -----  
Chinook\_sdY CACGTTAATAAGCTATAAAAATCATCAGGAGGCGATGTAAATTCGATAGT  
RT\_sdY -----

BT\_sdY -----  
AS\_Tasmanian\_Ssa02\_sdY -----  
AS\_Tasmanian\_Ssa03\_sdY -----  
AS\_European\_sdY -----  
AS\_Tasmanian\_Ssa06\_sdY -----  
Chinook\_sdY TGGCGTGTGGAAAAAATGTCCGGAAAAACACAGAGACAATGCCTCAGGTC  
RT\_sdY -----

BT\_sdY -----  
AS\_Tasmanian\_Ssa02\_sdY -----  
AS\_Tasmanian\_Ssa03\_sdY -----  
AS\_European\_sdY -----  
AS\_Tasmanian\_Ssa06\_sdY -----  
Chinook\_sdY GGTGGTTCGGAGGGAATCGGTTCCCTTTGGTCGGATCTACCAAGAATCAAA  
RT\_sdY -----

BT\_sdY -----  
AS\_Tasmanian\_Ssa02\_sdY -----  
AS\_Tasmanian\_Ssa03\_sdY -----  
AS\_European\_sdY -----  
AS\_Tasmanian\_Ssa06\_sdY -----  
Chinook\_sdY TCAGAATCAAATGAGGAGACTCTATACATCCTGTGGAAGCTGTAGGTACT  
RT\_sdY -----

BT\_sdY -----  
AS\_Tasmanian\_Ssa02\_sdY -----  
AS\_Tasmanian\_Ssa03\_sdY -----  
AS\_European\_sdY -----  
AS\_Tasmanian\_Ssa06\_sdY -----  
Chinook\_sdY GCAAGCTCGGCCTCATTTAATACGGTTACCTTTAACAATTCATGGAAGT  
RT\_sdY -----

BT\_sdY -----  
AS\_Tasmanian\_Ssa02\_sdY -----  
AS\_Tasmanian\_Ssa03\_sdY -----  
AS\_European\_sdY -----  
AS\_Tasmanian\_Ssa06\_sdY -----  
Chinook\_sdY GGCGCATGGATATTTTTTTTCCATCTCCAGTKATCAGATTTTCCTGCGCTT  
RT\_sdY -----

BT\_sdY -----  
AS\_Tasmanian\_Ssa02\_sdY -----  
AS\_Tasmanian\_Ssa03\_sdY -----  
AS\_European\_sdY -----  
AS\_Tasmanian\_Ssa06\_sdY -----  
Chinook\_sdY TTCGATGAAACAGACGTTCTGTTATAGTCACAGCCGTGATTTAAACAGTT  
RT\_sdY -----

BT\_sdY -----  
AS\_Tasmanian\_Ssa02\_sdY -----  
AS\_Tasmanian\_Ssa03\_sdY -----  
AS\_European\_sdY -----  
AS\_Tasmanian\_Ssa06\_sdY -----  
Chinook\_sdY TTAGAAACGTCTGAGTGTTTTCTATCCACACATACTAATCATATGCATAT  
RT\_sdY -----

BT\_sdY -----  
AS\_Tasmanian\_Ssa02\_sdY -----  
AS\_Tasmanian\_Ssa03\_sdY -----  
AS\_European\_sdY -----  
AS\_Tasmanian\_Ssa06\_sdY -----  
Chinook\_sdY ACTATATTCCTGGAATGAGTAGCAGGGCGCTGAAATGTTGCGCGATTTTT  
RT\_sdY -----

BT\_sdY -----  
AS\_Tasmanian\_Ssa02\_sdY -----  
AS\_Tasmanian\_Ssa03\_sdY -----  
AS\_European\_sdY -----  
AS\_Tasmanian\_Ssa06\_sdY -----  
Chinook\_sdY AACAAAAAGCTGCGAAAATTTCGCAGCCTCCCCAAGAGGTTTTAATTAAAC  
RT\_sdY -----TAAAC

BT\_sdY -----  
AS\_Tasmanian\_Ssa02\_sdY -----  
AS\_Tasmanian\_Ssa03\_sdY -----  
AS\_European\_sdY -----  
AS\_Tasmanian\_Ssa06\_sdY -----  
Chinook\_sdY AACCCAAAATATAAGCTTATTTAAATCCTATGTTTGTGAACTTTGTAAT  
RT\_sdY AACCCAAAATATAAGCTTGTTTAAATCCTATGTTTGTGAACTTTGTAAT

BT\_sdY -----  
AS\_Tasmanian\_Ssa02\_sdY -----  
AS\_Tasmanian\_Ssa03\_sdY -----  
AS\_European\_sdY -----  
AS\_Tasmanian\_Ssa06\_sdY -----  
Chinook\_sdY GTAAACAAACACTATATAGCCTTAAAAATGTTACTTATGTGATAATGCCT  
RT\_sdY GTAAACAAACACTATATAGCCTTAAAAATGTTACTTATGTGATAATGCCT

BT\_sdY -----  
AS\_Tasmanian\_Ssa02\_sdY -----  
AS\_Tasmanian\_Ssa03\_sdY -----  
AS\_European\_sdY -----  
AS\_Tasmanian\_Ssa06\_sdY -----  
Chinook\_sdY GAAAAAATGGTGTGGAGGGTATATTGGCACAGTGTGTTAGGCCTATA  
RT\_sdY GAAAAACAGTGTGGAGGGTATATTGGCGCAGTGTGTTAGGCCAATA

```

BT_sdY -----TA
AS_Tasmanian_Ssa02_sdY -----TA
AS_Tasmanian_Ssa03_sdY -----TA
AS_European_sdY -----TA
AS_Tasmanian_Ssa06_sdY -----TA
Chinook_sdY ATTTTGATAAATCTATTCATACTATTTTCATCCTTCTATTTTCATCCTTCTA
RT_sdY ATTTTGATAAATGTATTCATAC-----TA

```

\*\*

```

BT_sdY TG-----
AS_Tasmanian_Ssa02_sdY TT-----
AS_Tasmanian_Ssa03_sdY TT-----
AS_European_sdY TT-----
AS_Tasmanian_Ssa06_sdY TT-----
Chinook_sdY TTTCATCCTTCCACAAGATATAGTCCCGACACAACCATATGGTTGCTACC
RT_sdY TTTCATCCTTCCACAAGATATAGTCCCGACACAACCATATGGTTGCTACC

```

\*

```

BT_sdY -----
AS_Tasmanian_Ssa02_sdY -----
AS_Tasmanian_Ssa03_sdY -----
AS_European_sdY -----
AS_Tasmanian_Ssa06_sdY -----
Chinook_sdY CAAACTGGATGGTCATCCATTGGTTTTGGTTGCCAAAGACACAACCCAGT
RT_sdY CAAACTGGATGGTCATCCATTGG-TTTGGTTGCCAAAGACGCTACCCAGT

```

```

BT_sdY -----
AS_Tasmanian_Ssa02_sdY -----
AS_Tasmanian_Ssa03_sdY -----
AS_European_sdY -----
AS_Tasmanian_Ssa06_sdY -----
Chinook_sdY TGTTTCAGATTTTTTGTCTGTATCTATGGACACGACCTGGTTGTTTCATTT
RT_sdY TGTTTCAGATTTTTTGTCTGTAACTATGGACACGACCCGGTTGTTTCATTT

```

BT\_sdY -----  
AS\_Tasmanian\_Ssa02\_sdY -----  
AS\_Tasmanian\_Ssa03\_sdY -----  
AS\_European\_sdY -----  
AS\_Tasmanian\_Ssa06\_sdY -----  
Chinook\_sdY TAAATGTTCCATTGCCATTCTGGCTGGCAACATTCTTATCCTTTGCTTGC  
RT\_sdY TAAATGTTCCATTGCCATTCTGGCTGGCAACATTCTTATCCCTTG-TTGC

BT\_sdY -----  
AS\_Tasmanian\_Ssa02\_sdY -----  
AS\_Tasmanian\_Ssa03\_sdY -----  
AS\_European\_sdY -----  
AS\_Tasmanian\_Ssa06\_sdY -----  
Chinook\_sdY TAGCTAGCCAAGTGCAGTAACTTACAGTTACGTCAAACAGTGCAGTCAG  
RT\_sdY TAGCTAGTCAACTATGGCTAACTTACAGTTACGTCAAACAGTGCAGTGAG

BT\_sdY -----  
AS\_Tasmanian\_Ssa02\_sdY -----  
AS\_Tasmanian\_Ssa03\_sdY -----  
AS\_European\_sdY -----  
AS\_Tasmanian\_Ssa06\_sdY -----  
Chinook\_sdY CAACAAAGTATATTGCATTTGCATTTGTTTAAGATGTTTTCTAATGACAT  
RT\_sdY CACAAGTATATGCATTTGCATTGTTAG-----ACTTTTCTAAT

BT\_sdY -----  
AS\_Tasmanian\_Ssa02\_sdY -----  
AS\_Tasmanian\_Ssa03\_sdY -----  
AS\_European\_sdY -----  
AS\_Tasmanian\_Ssa06\_sdY -----  
Chinook\_sdY TTATTTGGATATAACAATGACTTACACAGTTTGGCCTGCCATAGAAAATG  
RT\_sdY TACATTTATTGGATGTAACATGACTCATGGTTGGCCTGCCATAGAAAATG



BT\_sdY -----  
AS\_Tasmanian\_Ssa02\_sdY -----  
AS\_Tasmanian\_Ssa03\_sdY -----  
AS\_European\_sdY -----  
AS\_Tasmanian\_Ssa06\_sdY -----  
Chinook\_sdY TTCTCTCTCATCAGGACACTGTTTACAGAGGAG-----CAACAACACAGC  
RT\_sdY TTCTCTCTCGTCAGGACACTGTTTACAGAGGAGCTAGTCAACAATACAGC

BT\_sdY -----AAGGGAATCTG-----  
AS\_Tasmanian\_Ssa02\_sdY -----AAGGGAATCTG-----  
AS\_Tasmanian\_Ssa03\_sdY -----AAGGGAATCTG-----  
AS\_European\_sdY -----AAGGGAATCTG-----  
AS\_Tasmanian\_Ssa06\_sdY -----AAGGGAATCTG-----  
Chinook\_sdY TAACACAATCACTTCAAACGGAAGCTGAAAAGACTGAAAAGCTGGCTGCAC  
RT\_sdY TAACACAATCACTTCAAACGGAAGCTGAAAAGACTCAAAGCTGGCTGCAC  
\*\* \*\*\*\*\* \*\*

BT\_sdY -----  
AS\_Tasmanian\_Ssa02\_sdY -----  
AS\_Tasmanian\_Ssa03\_sdY -----  
AS\_European\_sdY -----  
AS\_Tasmanian\_Ssa06\_sdY -----  
Chinook\_sdY TTTGTTTCCTTTTACCTGTTTTTTATTGATATTTTTTGTATATACAGTAT  
RT\_sdY TTTGTTTCCTTTTACCTGTTTTTTATTGATATTTTTTGTATATAGAGTAT

BT\_sdY -----  
AS\_Tasmanian\_Ssa02\_sdY -----  
AS\_Tasmanian\_Ssa03\_sdY -----  
AS\_European\_sdY -----  
AS\_Tasmanian\_Ssa06\_sdY -----  
Chinook\_sdY CCATAAAAATTATGCTGATTCATGATTTTGGCTGGCTGAGAAAAGCTGCC  
RT\_sdY CCATAAAAATTATGCTGATTCGTGATTTTGGCTGGCTGAGAAAAGCTGCC

BT\_sdY -----  
AS\_Tasmanian\_Ssa02\_sdY -----  
AS\_Tasmanian\_Ssa03\_sdY -----  
AS\_European\_sdY -----  
AS\_Tasmanian\_Ssa06\_sdY -----  
Chinook\_sdY AGCCTATCTGTCTCTTCCCGACTCCCGACACATTCGTTACTATGGGACAG  
RT\_sdY TGCCTATCTGTCTCTTCCCGACTCCCGACACATTCGTTACTATGGGACAG

BT\_sdY -----  
AS\_Tasmanian\_Ssa02\_sdY -----  
AS\_Tasmanian\_Ssa03\_sdY -----  
AS\_European\_sdY -----  
AS\_Tasmanian\_Ssa06\_sdY -----  
Chinook\_sdY CTGGAGAAATAATTTGAATTTTGAACAATGTTGCAATATATCAGAGAGA  
RT\_sdY CTAGAGAAATAATTTGAATTTTGAACAATGTTCCAATATATCAGAGAGA

BT\_sdY -----  
AS\_Tasmanian\_Ssa02\_sdY -----  
AS\_Tasmanian\_Ssa03\_sdY -----  
AS\_European\_sdY -----  
AS\_Tasmanian\_Ssa06\_sdY -----  
Chinook\_sdY CAGATAGTAAGGGTTATACAAATCTCCGCTGTTTAAACTAAATGTTAGT  
RT\_sdY CAGATAGTAAGGTTTATACAAATCTCCGCTGTTTAAACTAAA-----

BT\_sdY -----  
AS\_Tasmanian\_Ssa02\_sdY -----  
AS\_Tasmanian\_Ssa03\_sdY -----  
AS\_European\_sdY -----  
AS\_Tasmanian\_Ssa06\_sdY -----  
Chinook\_sdY CTAAATGGAATGTGAGATAATGTCTAGATGCTTTTAAATATTGGAGGTCAA  
RT\_sdY -----

BT\_sdY -----  
AS\_Tasmanian\_Ssa02\_sdY -----  
AS\_Tasmanian\_Ssa03\_sdY -----  
AS\_European\_sdY -----  
AS\_Tasmanian\_Ssa06\_sdY -----  
Chinook\_sdY GTTTATACATTGCCTGGCTGGGCTGATGAGACAGTGGATTGTGCTGTCAG  
RT\_sdY -TTTATACATTGCCTGGCTGGGCTGATGAGACAGTGGATTGTGCTGTCAG

BT\_sdY -----  
AS\_Tasmanian\_Ssa02\_sdY -----  
AS\_Tasmanian\_Ssa03\_sdY -----  
AS\_European\_sdY -----  
AS\_Tasmanian\_Ssa06\_sdY -----  
Chinook\_sdY ATGGAACAGAGTAAATAGGCATTTTAAACAACATAGATTTAGCTGGTAGTA  
RT\_sdY ATGGAGCAGAGTAAATAGGCATTTTACATAGATAGATTTAGCTGGTAGTA

BT\_sdY -----  
AS\_Tasmanian\_Ssa02\_sdY -----  
AS\_Tasmanian\_Ssa03\_sdY -----  
AS\_European\_sdY -----  
AS\_Tasmanian\_Ssa06\_sdY -----  
Chinook\_sdY ACTTGTTGGAATAGATACTGGCTTGAATGCATTTTTTAACCAATCAGCATTC  
RT\_sdY ACTTGTTGGAATAGATACTGGCTTGAATGCATTTTTTAACCCATCAGCATTC

BT\_sdY -----  
AS\_Tasmanian\_Ssa02\_sdY -----  
AS\_Tasmanian\_Ssa03\_sdY -----  
AS\_European\_sdY -----  
AS\_Tasmanian\_Ssa06\_sdY -----  
Chinook\_sdY ATGATTACACACACACGTTGTATAAAACGTATATTGCCAACGATAATGTT  
RT\_sdY ATGATTACACCCACACGTTGTATAAAACGTATATTGCCAACTATAATGTT

```

BT_sdY          -----TTACGGGTAAT-----TCACAACAGATTCCACGAAACACTAATTG
AS_Tasmanian_Ssa02_sdY  -----TTACGGGTAAT-----TCACAACAGATTTTCACGAAACACTAATTG
AS_Tasmanian_Ssa03_sdY  -----TTACGGGTAAT-----TCACAACAGATTTTCACGAAACACTAATTG
AS_European_sdY        -----TTACGGGTAAT-----TCACAACAGATTTTCACGAAACACTAATTG
AS_Tasmanian_Ssa06_sdY  -----TTACGGGTAAT-----TCACAACAGATTTTCACGAAACACTAATTG
Chinook_sdY          GATATTATGGTTAGTCAGTCCTCACAAACAGGTTTCACAAAACACTAAGTG
RT_sdY            GATATTATGGTTAGTCAGTCCTCACAAACAGGTTTCACAAAACACTAAGTG
                  ***  **  *  *  *          *****  **  ***  *****  **

```

```

BT_sdY          TGTGCCCTCAGGCCCTACTCCGCTACCACGTAACTACAACACAAAATCA
AS_Tasmanian_Ssa02_sdY  TGTGCCCTCAGACCCTTACTCCGCTACCACGTAACTACAACACAAAATCA
AS_Tasmanian_Ssa03_sdY  TGTGCCCTCAGACCCTTACTCCGCTACCACGTAACTACAACACAAAATCA
AS_European_sdY        TGTGCCCTCAGACCCTTACTCCGCTACCACGTAACTACAACACAAAATCA
AS_Tasmanian_Ssa06_sdY  TGTGCCCTCAGACCCTTACTCCGCTACCACGTAACTACAACACAAAATCA
Chinook_sdY          TGTGCCCTCAGACCCTACTCCACTACCCTATATCTACAACACAAAATSC
RT_sdY            TGTGCCCTCAGACCCTACTCCACTACCCTATATCTACAACACAAAATCC
                  *****  ***  *****  *****          **  *****

```

```

BT_sdY          ATGTGTAAATTTTTGTATTGTGCGTATGTTATCTTGTGTGTGTATGCGTG
AS_Tasmanian_Ssa02_sdY  ATGTGTACATTTTTGTATTGTGCGTATGTTATCTTGTGTGTGTATGCATG
AS_Tasmanian_Ssa03_sdY  ATGTGTACATTTTTGTATTGTGCGTATGTTATCTTGTGTGTGTATGCATG
AS_European_sdY        ATGTGTACATTTTTGTATTGTGCGTATGTTATCTTGTGTGTGTATGCATG
AS_Tasmanian_Ssa06_sdY  ATGTGTACATTTTTGTATTGTGCGTATGTTATCTTGTGTGTGTATGCATG
Chinook_sdY          ATGTGTACGTGTGTGTATTGTGAGTATGTTATCGTGTGCGTTTATGCATG
RT_sdY            ATGTGTACGTGTGTGTATTGTGAGTATGTTATTGTGTGCGTTTATGCATG
                  *****  *  *  *****  *****          *****  **  *****  **

```

```

BT_sdY          TGTCGGTGCCTATGATTGTGTTGCTTCACAGACCCCGCTGTTCCATAATG
AS_Tasmanian_Ssa02_sdY  TGTCGGTGCCTATGATTGTGTTGCTTCACAGACCCCGCTGTTCCATAATG
AS_Tasmanian_Ssa03_sdY  TGTCGGTGCCTATGATTGTGTTGCTTCACAGACCCCGCTGTTCCATAATG
AS_European_sdY      TGTCGGTGCCTATGATTGTGTTGCTTCACAGACCCCGCTGTTCCATAATG
AS_Tasmanian_Ssa06_sdY  TGTCGGTGCCTATGATTGTGTTGCTTCACAGACCCCGCTGTTCCATAATG
Chinook_sdY        TGTCAGTGCCTATSTTTGTGTTGCTTCACAGTCCCGCTGTTCCATAAGG
RT_sdY          TGTCAGTACCTATGTTTGTGTTGCTTCACAGTCCCGCTGTTCCATAAGG
***  *  *****  *****  *****  *****  *

```

```

BT_sdY          TGTATTTTTT-----ATCTGATTTTATTGA-TGCATCA
AS_Tasmanian_Ssa02_sdY  TGTATTTTTT-----ATCTGATTTTATTGC-TGCATCA
AS_Tasmanian_Ssa03_sdY  TGTATTTTTT-----ATCTGATTTTATTGC-TGCATCA
AS_European_sdY      TGTATTTTTT-----ATCTGATTTTATTGC-TGCATCA
AS_Tasmanian_Ssa06_sdY  TGTATTTTTT-----ATCTGATTTTATTGC-TGCATCA
Chinook_sdY        TGTATTTTTTTAAATCTTTTTTTTTT---ATCTGATTCT--TGCATTTATCA
RT_sdY          TGTATTTTTTTTATCTGTTTTTTTTTTAAATCTGATTCTACTGCTTGCATCA
*****          *****  *  **  *  ****

```

```

BT_sdY          GTTACC-----TGATGTGGAATAGTGTTCATGTAGTCATGGCTCTAT
AS_Tasmanian_Ssa02_sdY  GTTACC-----TGATGTGGAATAGAGTTCCATGTAGTCATGGCTCTAT
AS_Tasmanian_Ssa03_sdY  GTTACC-----TGATGTGGAATAGAGTCCCATGTAGTCATGGCTCTGT
AS_European_sdY      GTTACC-----TGATGTGGAATAGAGTTCCATGTAGTCATGGCTCTAT
AS_Tasmanian_Ssa06_sdY  GTTACC-----TGATGTGGAATAGAGTTCCATGTAGTCATGGCTCTAT
Chinook_sdY        TTTACCACACATTTTATGTGGAATAGAGTTCCATGTAGTCATGGCTCTAT
RT_sdY          TTTACC-----TGATGTGGAATAAAGTTCCATGTAGCCATGGCTCTAT
*****          *  *****  **  *****  *****  *

```

```

BT_sdY          GTAGTACTGTGCTCCTCCCATAG-----TCTGTTCTGGACTTGGGGACTG
AS_Tasmanian_Ssa02_sdY  ATAGTACTGTGCTCCTCCCATAA-----TCTGTTCTGGACTTGGAGGACTG
AS_Tasmanian_Ssa03_sdY  ATAGTACTGTGCTCCTCCCATAA-----TCTGTTCTGGACTTGGAGGACTG
AS_European_sdY        ATAGTACTGTGCTCCTCCCATAA-----TCTGTTCTGGACTTGGAGGACTG
AS_Tasmanian_Ssa06_sdY  ATAGTACTGTGCTCCTCCCATAA-----TCTGTTCTGGACTTGGAGGACTG
Chinook_sdY          GTAGTAATGATTGCCTCTCATGGTCTGTTCTGTTCTGGACTTGGGGACTG
RT_sdY            GTAGTAATGATCGCCTCCCATGG-----TCTGTTCTGGACTTGGGGACTG
                ***** **      ***** ***      *****

```

```

BT_sdY          TGAAGAGACCTCTGGTGACATGTCTTGTGGGGTATGGATGGGTGTCTGAG
AS_Tasmanian_Ssa02_sdY  TGAAGAGACCTCTGGTGGCATGTCTTGTGGGGTA-----
AS_Tasmanian_Ssa03_sdY  TGAAGAGACCTCTGGTGGCATGTCTTGTGGGGTA-----
AS_European_sdY        TGAAGAGACCTCTGGTGGCATGTCTTGTGGGGTA-----
AS_Tasmanian_Ssa06_sdY  TGAAGAGACCTCTGGTGGCATGTCTTGTGGGGTA-----
Chinook_sdY          TGAAGAGACCTCTGGTGGCATGTCTTGTGGGGTA-----
RT_sdY            TGAAGAGACCTCTGGTGGCATGTCTTGTGGGGTA-----
                *****

```

```

BT_sdY          CTGTGAGCCAGTAGTTTAAACAGACCTCTGGTGGCATGTCTTGTGGGGTA
AS_Tasmanian_Ssa02_sdY  -----
AS_Tasmanian_Ssa03_sdY  -----
AS_European_sdY        -----
AS_Tasmanian_Ssa06_sdY  -----
Chinook_sdY          -----
RT_sdY            -----

```

```

BT_sdY          TGGATGGGTGTCTGAGCTGTGAGCCAGTAGTTTAAACAGACCTCTGGTGA
AS_Tasmanian_Ssa02_sdY -----
AS_Tasmanian_Ssa03_sdY -----
AS_European_sdY -----
AS_Tasmanian_Ssa06_sdY -----
Chinook_sdY    -----
RT_sdY         -----

```

```

BT_sdY          CATGTCTTGTGGGGTATGGATGGGTGTCTGAGCTGTGTGCCAGTAGTTCA
AS_Tasmanian_Ssa02_sdY -----TGGGGTATGCATGGGTGTCCGAGCTGTGTGCCAGTAGTTCA
AS_Tasmanian_Ssa03_sdY -----TGGGGTATGCACGGGTGTCCGAGCTGTGTGCCAGTAGTTCA
AS_European_sdY -----TGGGGTATGCATGGGTGTCCGAGCTGTGTGCCAGTAGTTCA
AS_Tasmanian_Ssa06_sdY -----TGGGGTATGCGTGGGTGTCCGAGCTGTGTGCCAGTAGTTCA
Chinook_sdY    -----TGAGTTTTGCATGGGTGTCCACGCTGTGTGCCAGTTGTTCA
RT_sdY         -----TGAGTTTTGCAT--GTGTCCACGCTGTGTGCCAGTTGTTCA
                ** * * * *      * * * * *      * * * * * * * * * * * * * * * *

```

```

BT_sdY          AACAGACAGTTCAGTACATTCAACATGTCAGTACATTTTCAAAATACAAG
AS_Tasmanian_Ssa02_sdY AACAGACAATTCAGTACATTCAACATGTCAGTACATTTTCAAAATACAAG
AS_Tasmanian_Ssa03_sdY AACAGACAATTCAGTACATTCAACATGTCAGTACATTTTCAAAATACAAG
AS_European_sdY    AACAGACAATTCAGTACATTCAACATGTCAGTACATTTTCAAAATACAAG
AS_Tasmanian_Ssa06_sdY AACAGACAATTCAGTACATTCAACATGTCAGTACATTTTCAAAATACAAG
Chinook_sdY    AACAGACAGCTTGGTACATTCAACATTTCAATACATTTTATAAAATAAAAG
RT_sdY         AACAGACAGCTTGGTACATTCAACATTTCAATACATTTTATAAAATACAAG
                * * * * * * * * * * * * * * * * * * * * * * * * * * * *

```

```

BT_sdY          TAGTGATGAAGTCAATCTCTCCTCCACTTTGAGCCATGAGAGATTTACAT
AS_Tasmanian_Ssa02_sdY TAGTGATGAAGTCAATCTCTCCTCCACTTTGAGCCATGAGAGATTTACAT
AS_Tasmanian_Ssa03_sdY TAGTGATGAAGTCAATCTCTCCTCCACTTTGAGCCATGAGAGATTTACAT
AS_European_sdY TAGTGATGAAGTCAATCTCTCCTCCACTTTGAGCCATGAGAGATTTACAT
AS_Tasmanian_Ssa06_sdY TAGTGATGAAGTCAATCTCTCCTCCACTTTGAGCCATGAGAGATTTACAT
Chinook_sdY TAGCGATGAAGTCAATCTCTCCTCTGCTTTGAGCCTGGAGAGATTGACAT
RT_sdY TAGCAATGAAGTCAATCTCTCCTCTGCTTTGAGCCTGGAGAGATTGACAT
***      *****      *****      *****      *****

```

```

BT_sdY          GCATATTATTAATGTTAGCTCTCCATGTACATTTAAGGGCCAGCCGTGCT
AS_Tasmanian_Ssa02_sdY GCATATTATTAATGTTAGCTCTC--TCTACATTTAAGG----GCCGTGCT
AS_Tasmanian_Ssa03_sdY GCATATTATTAATGTTAGCTCTC--TCTACATTTAAGG----GCCGTGCT
AS_European_sdY GCATATTATTAATGTTAGCTCTC--TCTACATTTAAGG----GCCGTGCT
AS_Tasmanian_Ssa06_sdY GCATATTATTAATGTTAGCTCTC--TCTACATTTAAGG----GCCGTGCT
Chinook_sdY GCACAT-----ATATCAGCT-----GATGTAAGA-----AGGGCT
RT_sdY GCATAT-----ATATCAGCT-----GATGTAAGA-----AGGGCT
***  **      ** * ****      ** ****      * ***

```

```

BT_sdY          GCCCTGTTCTAGGCCAGTTGTTATTTTCCCAAGTCCCTCTTTGTGGAGAG
AS_Tasmanian_Ssa02_sdY GCCCTGTTCTAGGCCAGTTGTTATTTTCCCAAGTCCCTCTTTGTGGAGAG
AS_Tasmanian_Ssa03_sdY GCCCTGTTCTAGGCCAGTTGTTATTTTCCCAAGTCCCTCTTTGTGGAGAG
AS_European_sdY GCCCTGTTCTAGGCCAGTTGTTATTTTCCCAAGTCCCTCTTTGTGGAGAG
AS_Tasmanian_Ssa06_sdY GCCCTGTTCTAGGCCAGTTGTTATTTTCCCAAGTCCCTCTTTGTGGAGAG
Chinook_sdY ATATAAATATATTTGATTTGAAATTT-----G
RT_sdY ATATAAATACATTTGATTTGAAATTT-----G
* * * * *

```



```

BT_sdY      ATTGACATATTATTAATATTAGGTGACCCCTTTGTTATTGGTTCAATTAC
AS_Tasmanian_Ssa02_sdY  ATTGACATATTATTAT-----ATTTGTTTTTTGGTTCAATTAC
AS_Tasmanian_Ssa03_sdY  ATTGACATATTATTAT-----ATTTGTTTTTTGGTTCAATTAC
AS_European_sdY      ATTGACATATTATTAT-----ATTTGTTTTTTGGTTCAATTAC
AS_Tasmanian_Ssa06_sdY  ATTGACATATTATTAT-----ATTTGTTTTTTGGTTCAATTAC
Chinook_sdY      ATTAGCATATTATTATTATTTCGATGAACACTTTTGTATTGGTTCATTTAC
RT_sdY      ATTTGCATATTATTATTATTTCGATGAACACTTTTGTGTTGGTTCATTTAC
***      *****      *****      *****      *****

```

```

BT_sdY      GGATAATAGCTTAAAGTCCATTTTTCACTAAGGGCTCGATTCAATTTGT-
AS_Tasmanian_Ssa02_sdY  GGATAATAGCTTAAAGTCCATTTTTCACTAAGGGCTCGATTCAATTTGT-
AS_Tasmanian_Ssa03_sdY  GGATAATAGCTTAAAGTCCATTTTTCACTAAGGGCTCGATTCAATTTGT-
AS_European_sdY      GGATAATAGCTTAAAGTCCATTTTTCACTAAGGGCTCGATTCAATTTGT-
AS_Tasmanian_Ssa06_sdY  GGATAATAGCTTAAAGTCCATTTTTCACTAAGGGCTCGATTCAATTTGT-
Chinook_sdY      AGATAATTGCTTAAATTCAATGTTTCACTAAGGGC-CGATTCAATCTGTA
RT_sdY      AGATAATTGCTTGAATTCAATGTTTCACTAAGGGCTCGATTCAATCTGTA
*****      ****      **      *      *      *****      *****      ****

```

```

BT_sdY      -----AGTTCGGGGCTAATGCTGAATTACATTTAAAGGTAA-ATTCCG
AS_Tasmanian_Ssa02_sdY  -----AGTTCGGGGCTAATGCTGAATTACATTTAAAGGTAA-ATTCTG
AS_Tasmanian_Ssa03_sdY  -----AGTTCGGGGCTAATGCTGAATTACATTTAAAGGTAA-ATTCTG
AS_European_sdY      -----AGTTCGGGGCTAATGCTGAATTACATTTAAAGGTAA-ATTCTG
AS_Tasmanian_Ssa06_sdY  -----AGTTCGGGGCTAATGCTGAATTACATTTAAAGGTAA-ATTCTG
Chinook_sdY      TTGCGGAAGTTGAAGGCTAATGCTTGATTACATTTGAAGGTAA-TTTCCG
RT_sdY      TTGCGGAAGTTCAAGGCTAATGCTTGATTACATTTGAAGGTAAATTTTCCG
****      *****      *****      *****      *****      **** *

```

```

BT_sdY      ATTTAGCTGACATACTGTTTGCAGCATATACTGTAAATGCA-----ACA
AS_Tasmanian_Ssa02_sdY  ATTTAGCTGACATACTGTTTGCAGCGTATACTGTAAATGCA-----ACA
AS_Tasmanian_Ssa03_sdY  ATTTAGCTGACATACTGTTTGCAGCGTATACTGTAAATGCA-----ACA
AS_European_sdY        ATTTAGCTGACATACTGTTTGCAGCGTATACTGTAAATGCA-----ACA
AS_Tasmanian_Ssa06_sdY  ATTTAGCTGACATACTGTTTGCAGCGTATACTGTAAATGCA-----ACA
Chinook_sdY           AATTGAGCCGACATACTGTTTGCAGCATATAATGTAAATGCAGTCTCCACA
RT_sdY             AATTGAGCCGACATACTGTTTGCAGCATATACTGCAAATGCAGTCTCCACA
*** ** *

```

```

BT_sdY      AAATGCAGGATCATTGCCTTAAATGTATATTGCGCATTAGAACTGCTTTG
AS_Tasmanian_Ssa02_sdY  AAATGCAGGATCATTGCC-----TTAGCACTGTTTTG
AS_Tasmanian_Ssa03_sdY  AAATGCAGGATCATTGCC-----TTAGCACTGTTTTG
AS_European_sdY        AAATGCAGGATCATTGCC-----TTAGCACTGTTTTG
AS_Tasmanian_Ssa06_sdY  AAATGCAGGATCATTGCC-----TTAGCACTGTTTTG
Chinook_sdY           AAATGCAGGAGCATTTCCTTAAATGTATTTTTTGTATTAGCACTGCATTG
RT_sdY             AAATGCAGGAGCATTTCCTTAAATGTATTTTTTGTATTAGCACTGCATTG
***** ** *

```

```

BT_sdY      ATGTTAATGTGAGCATCCCTCTCTTGTCCCTACTGAATCTGGCTGATAATA
AS_Tasmanian_Ssa02_sdY  ATGTTAATGTGAGCATCCCTCTCTTGTCCCTACTGAATCAGGCTGATAATA
AS_Tasmanian_Ssa03_sdY  ATGTTAATGTGAGCATCCCTCTCTTGTCCCTACTGAATCTGGCTGATAATA
AS_European_sdY        ATGTTAATGTGAGCATCCCTCTCTTGTCCCTACTGAATCTGGCTGATAATA
AS_Tasmanian_Ssa06_sdY  ATGTTAATGTGAGCATCCCTCTCTTGTCCCTACTGAATCTGGCTGATAATA
Chinook_sdY           ATGTTATTGTGAGCATCACTCTCTTGTCCCTACTGAATTTGTCTGATTATA
RT_sdY             ATGTTAATGTGAGCATCACTCTCTCGTACTACTGAATTTGTCTGATTATA
***** *

```

|                        |                                                     |
|------------------------|-----------------------------------------------------|
| BT_sdY                 | TTACTGATTGTATCACTGATGAAATTACAGTAGTGTGTTTATCATGTGAT  |
| AS_Tasmanian_Ssa02_sdY | TTACTGATTGTATCACTGATGAAATTACAGTAGTGTGTTTATCATGTGAT  |
| AS_Tasmanian_Ssa03_sdY | TTACTGATTGTATCACTGATGAAATTACAGTAGTGTGTTTATCATGTGAT  |
| AS_European_sdY        | TTACTGATTGTATCACTGATGAAATTACAGTAGTGTGTTTATCATGTGAT  |
| AS_Tasmanian_Ssa06_sdY | TTACTGATTGTATCACTGATGAAATTACAGTAGTGTGTTTATCATGTGAT  |
| Chinook_sdY            | TTACTGATTGTATCACTGATGATATTGCAGCAGTGTGTATGTCATGTGAT  |
| RT_sdY                 | TTACTGATTGTATCACTGATGATATTGCAGCGGTGTGTTTGTTCATGTGAT |
|                        | *****                                               |

|                        |                             |       |                          |
|------------------------|-----------------------------|-------|--------------------------|
|                        |                             | exon3 |                          |
|                        |                             |       | -----Exon 3F-----        |
| BT_sdY                 | GGATTACTGACTTTTGTGTGTCCTTAG |       | AGTTGGAACGCTTCAGCCGAGCAG |
| AS_Tasmanian_Ssa02_sdY | GGATTACTGACTTTTGTGTGTCCTTAG |       | AGTTGGAACGCTTCAGCAGAGCAG |
| AS_Tasmanian_Ssa03_sdY | GGATTACTGACTTTTGTGTGTCCTTAG |       | AGTTGGAACGCTTCAGCAGAGCAG |
| AS_European_sdY        | GGATTACTGACTTTTGTGTGTCCTTAG |       | AGTTGGAACGCTTCAGCAGAGCAG |
| AS_Tasmanian_Ssa06_sdY | GGATTACTGACTTTTGTGTGTCCTTAG |       | AGTTGGAACGCTTCAGCAGAGCAG |
| Chinook_sdY            | GTATTACTGACTCTCTGTGTGCCATAG |       | AGTTGGAACGCTTCGCCAGAGCAG |
| RT_sdY                 | GTATTACTGACTCTGTGTGTCCTTAG  |       | AGTTGGACCGCTTCGCCAGAGCAG |
|                        | * *****                     |       | * *****                  |

|                        |                                                     |        |
|------------------------|-----------------------------------------------------|--------|
|                        | exon3                                               |        |
|                        | --->                                                | <----- |
| BT_sdY                 | ATGGCTTCCAACCGCAAATTGGGTTTCAGCCTATGGTTCGGACAAGACTCA |        |
| AS_Tasmanian_Ssa02_sdY | ATGGCTTCCAACCGCAAATTGGGTTTCAGCCTATGGTTCGGACAAGACTCA |        |
| AS_Tasmanian_Ssa03_sdY | ATGGCTTCCAACCGCAAATTGGGTTTCAGCCTATGGTTCGGACAAGACTCA |        |
| AS_European_sdY        | ATGGCTTCCAACCGCAAATTGGGTTTCAGCCTATGGTTCGGACAAGACTCA |        |
| AS_Tasmanian_Ssa06_sdY | ATGGCTTCCAACCGCAAATTGGGTTTCAGCCTATGGTTCGGACAAGACTCA |        |
| Chinook_sdY            | ATGGCTCCCAACCTCAATGTGGGTTTCAGCCTATGGTTTGGACAAGACTCA |        |
| RT_sdY                 | ATGGCTCCCAACCTCAATGTGGGTTTCAGCCTATGGTTTGGACAAGACTCA |        |
|                        | *****                                               | *****  |

exon3

---Exon 3R-----

|                        |    |                            |  |                         |
|------------------------|----|----------------------------|--|-------------------------|
| BT_sdY                 | TC | ACTCAGTGCACCAATCTCTATATCG  |  | GTACAGATTATTATTATTATATA |
| AS_Tasmanian_Ssa02_sdY | TC | ACTCAGTGCACCAATCTCTATATCG  |  | GTACAGATTATTATTATTATATA |
| AS_Tasmanian_Ssa03_sdY | TC | ACTCAGTGCACCAATCTCTATATCG  |  | GTACAGATTATTATTATTATATA |
| AS_European_sdY        | TC | ACTCAGTGCACCAATCTCTATATCG  |  | GTACAGATTATTATTATTATATA |
| AS_Tasmanian_Ssa06_sdY | TC | ACTCAGTGCACCAATCTCTATATCG  |  | GTACAGATTATTATTATTATATA |
| Chinook_sdY            | TC | ACTCAGTGCACCAAACCTTTATATCG |  | GTACAGATT----CTCTTAC--- |
| RT_sdY                 | TC | ACTCAGTGCACCAATCTTTATATCG  |  | GTACAGATT----CTCTTAC--- |
|                        |    | ***** ** *****             |  | ***** * **              |

|                        |                                                    |
|------------------------|----------------------------------------------------|
| BT_sdY                 | TAGATTATCTGGTGCCTTGAATACATTAACACAGCGCCGTCCTCAGAAAT |
| AS_Tasmanian_Ssa02_sdY | TAGATTATCTGGTGCCTTGAATACATTAACACAGTGCCGGCCTCAGAAAT |
| AS_Tasmanian_Ssa03_sdY | TAGATTATCTGGTGCCTTGAATACATTAACACAGTGCCGGCCTCAGAAAT |
| AS_European_sdY        | TAGATTATCTGGTGCCTTGAATACATTAACACAGTGCCGGCCTCAGAAAT |
| AS_Tasmanian_Ssa06_sdY | TAGATTATCTGGTGCCTTGAATACATTAACACAGTGCCGGCCTCAGAAAT |
| Chinook_sdY            | -----TCTGGGGCATTGTACACATTAACACAGGGCCGACGCTAGAAGG   |
| RT_sdY                 | -----TCTGGGGCATTGTACACATTAACACAGGGCCGACGCTAGAAGG   |
|                        | ***** ** *** * ***** ***** * ****                  |

<---AS&BT 10bo gap R--

|                        |                                                     |
|------------------------|-----------------------------------------------------|
| BT_sdY                 | AACCATTGGGAAGGGCAATTGATTTCCATAGGCGGACATGTTTTTTTTTCA |
| AS_Tasmanian_Ssa02_sdY | AACCA--AGGAAGGGCAATTGATTTCCATAGGCGGACATGTTTTTTTTTCA |
| AS_Tasmanian_Ssa03_sdY | AACCATTGGGAAGGGCAATTGATTTCCATAGGCGGACATGTTTTTTTTTCA |
| AS_European_sdY        | AACCATTGGGAAGGGCAATTGATTTCCATAGGCGGACATGTTTTTTTTTCA |
| AS_Tasmanian_Ssa06_sdY | AACCA--AGGAAGGGCAATTGATTTCCATAGGCGGACATGTTTTTTTTTCA |
| Chinook_sdY            | AATCATTGAGAAGGGCAATTGATTTCCATAGG-----ATG-TTTTTTTTCA |
| RT_sdY                 | AATCATTGAGAAG-----GATTTCCATAGG-----ATG-TTTTTTTTCA   |
|                        | ** ** **** ***** ** *****                           |

```

BT_sdY      TGGCTTTTATAGTAAAGACATGTCATTTATCTTAACAAATGTATTACCTT
AS_Tasmanian_Ssa02_sdY  TGGCTTTTATAGTAAAGACATGTCATTTATCTTAACAAATGTATTACCTT
AS_Tasmanian_Ssa03_sdY  TGGCTTTTATAGTAAAGACATGTCATTTATCTTAACAAATGTATTACCTT
AS_European_sdY      TGGCTTTTATAGTAAAGACATGTCATTTATCTTAACAAATGTATTACCTT
AS_Tasmanian_Ssa06_sdY  TGGGTTTTATAGTAAAGACATGTCATTTATCTTAACAAATGTATTACCTT
Chinook_sdY      TGGTTTTTATAGTAAAG--ATGTAATTTTATCTTTAAAAATATATTTCCCTT
RT_sdY      TGGTTTTTATAGTAAAG--ATGTAATTTTTCTTTAAAAATATATTCCTT
***  *****  *****  *****  *  *****  *****  *****

```

-Exon 3-intron-end F2->

```

BT_sdY      TTAATGTGGTATGAACACAACCAGTCATGATGTTTTTCATCTGATTGTCAA
AS_Tasmanian_Ssa02_sdY  TTAATGTGGTATGAACACAACCAGTCATGATGTTTTTCATCTGATTGTCAA
AS_Tasmanian_Ssa03_sdY  TTAATGTGGTATGAACACAACCAGTCATGATGTTTTTCATCTGATTGTCAA
AS_European_sdY      TTAATGTGGTATGAACACAACCAGTCATGATGTTTTTCATCTGATTGTCAA
AS_Tasmanian_Ssa06_sdY  TTAATGTGGTATGAACACAACCAGTCATGATGTTTTTCATCTGATTGTCAA
Chinook_sdY      TTAATGTGGCATGTACACAACCAGTCATGATGTTTTTCATCTGATTGTCAA
RT_sdY      TTAATGTGGCACGTACACAACCAGTCATGATGTTTTTCATCTGATTGTCAA
*****  *  *  *****

```

```

BT_sdY      AC-----
AS_Tasmanian_Ssa02_sdY  ACGAATCTTTGTAAGTCGCTCTGGATAAGAGCGTCTGCTAAATGACTTAA
AS_Tasmanian_Ssa03_sdY  ACGAATCTTTGTAAGTCGCTCTGGATAAGAGCGTCTGCTAAATGACTTAA
AS_European_sdY      ACGAATCTTTGTAAGTCGCTCTGGATAAGAGCGTCTGCTAAATGACTTAA
AS_Tasmanian_Ssa06_sdY  ACGAATCTTTGTAAGTCGCTCTGGATAAGAGCGTCTGCTAAATGACTTAA
Chinook_sdY      AA-----
RT_sdY      AA-----
*

```

```

BT_sdY -----GAATCACTTCAAAAAGTAGGTTACCTTTGCACGTT
AS_Tasmanian_Ssa02_sdY ATGTTAAATGTAAATGAATCACTTCAAAAAGTAGGTTACCTTCGCACGTT
AS_Tasmanian_Ssa03_sdY ATGTTAAATGTAAATGAATCACTTCAAAAAGTAGGTTACCTTCGCACGTT
AS_European_sdY ATGTTAAATGTAAATGAATCACTTCAAAAAGTAGGTTACCTTCGCACGTT
AS_Tasmanian_Ssa06_sdY ATGTTAAATGTAAATGAATCACTTCAAAAAGTAGGTTACCTTCGCACGTT
Chinook_sdY -----AAATAATTTCAAAAAGTATGTTACCTTCGCATGTT
RT_sdY -----AAATAATTTCAAAAAGTAGGTTACCTTCGCATGTT
          *** * ***** **

```

```

BT_sdY CGTCCAAAATAATTCTAGCATCCGAAGACTGCACTGTGTACCCGCCAACT
AS_Tasmanian_Ssa02_sdY CGTCCAAAATAATTCTAGCATCCGAAGACTGCACTGTGTACCCGCCAACT
AS_Tasmanian_Ssa03_sdY CGTCCAAAATAATTCTAGCATCCGAAGACTGCACTGTGTACCCGCCAACT
AS_European_sdY CGTCCAAAATAATTCTAGCATCCGAAGACTGCACTGTGTACCCGCCAACT
AS_Tasmanian_Ssa06_sdY CGTCCAAAATAATTCTAGCATCCGAAGACTGCACTGTGTACCCGCCAACT
Chinook_sdY CATCCAAAATAATTCTAGCATTTGAACTGGGCACTGTGGACCTGCCAATT
RT_sdY CATCCAAAATAATTCTAGCATTTGAACTGGGCACTGTGGACCTGCCAATT
          * ***** ** ***** **

```

```

BT_sdY TTTGTTCAATTTGCAAGTGGT-----TGGAGAAAACATCAG
AS_Tasmanian_Ssa02_sdY TTTGTTCAATTTGCAAGTGGT-----TGGAGAAAACATCTG
AS_Tasmanian_Ssa03_sdY TTTGTTCAATTTGCAAGTGGT-----TGGAGAAAACATCAG
AS_European_sdY TTTGTTCAATTTGCAAGTGGT-----TGGAGAAAACATCAG
AS_Tasmanian_Ssa06_sdY TTTGTTCAATTTGCAAGTGGT-----TGGAGAAAACATCTG
Chinook_sdY TTCTTTCAATTTGCACGTGGTTGAACTATCTTACTGGAGAAAACATCAG
RT_sdY TTCTTTCAATTTGCAAGTGGCTGAACTATCTTACTGGAGAAAACATCAG
          ** ***** ** ***** *

```

```

BT_sdY          AGTGAGCAAAACAGCGTCTTG-----
AS_Tasmanian_Ssa02_sdY  AGCGAGCAAAAGAGCGTCTTG-----
AS_Tasmanian_Ssa03_sdY  AGCGAGCAAAAGAGCGTCTTG-----
AS_European_sdY        AGCGAGCAAAAGAGCGTCTTG-----
AS_Tasmanian_Ssa06_sdY  AGCGAGCAAAAGAGCGTCTTG-----
Chinook_sdY          ATAGAGCAAAACAGTGCCTTACTATATGTAGCCCATGTTTCTGATGCTAT
RT_sdY            ATAGAGCAAAACAGTGCCTTACTATATGTAGCCCATGTTTCTGATGCTAT
*   *****   ** *   ***

```

```

BT_sdY          -----GCTATTGTGGGCATGATAGCATC
AS_Tasmanian_Ssa02_sdY  -----GCTATTGTGGGCTAGACAGCATC
AS_Tasmanian_Ssa03_sdY  -----GCTATTGTGGGCTAGACAGCATC
AS_European_sdY        -----GCTATTGTGGGCTAGACAGCATC
AS_Tasmanian_Ssa06_sdY  -----GCTATTGTGGGCTAGACAGCATC
Chinook_sdY          TTGGCTAAAAATAGTATGACATGTCATACTATTGTGGGCCAGACAGCATC
RT_sdY            CTGGCTAAAAATAGTATGACATGTCATACTATTGTGGGCCAGACAGCATC
*   *****   **   *****

```

```

BT_sdY          AGA-----CTAGATACAGCAAGA-----CGCTGTTTCGCTCACT
AS_Tasmanian_Ssa02_sdY  AGG-----CTACGTATAGTAAGA-----CGCTGTTTCGCTCACT
AS_Tasmanian_Ssa03_sdY  AGG-----CTACATATAGTAAGA-----CGCTGTTTCGCTCACC
AS_European_sdY        AGG-----CTACATATAGTAAGA-----CGCTGTTTCGCTCACT
AS_Tasmanian_Ssa06_sdY  AGG-----CTACATATAGTAAGA-----CGCTGTTTCGCTCACT
Chinook_sdY          AGACACATGGCCTACACACTCTGAGACAGAGGGGCGCTGTCTGGCTCACT
RT_sdY            AGACACATGGCCTACACACTCTGAGACAGAGGGGCGCTGTCTGGCTCACT
**               ***   *   ***               ***** *   *****

```

```

BT_sdY          CGAATACTTTATCTGAGATTTACGTGCTTTTCTGTCGGCACGAGTCTCG-
AS_Tasmanian_Ssa02_sdY  CGAATACTTTATCTGAGATTTACGTGGTTTTCTGTCGGCACGAGTCTCGG
AS_Tasmanian_Ssa03_sdY  CGAATACTTTATCTGAGATTTACGTGGTTTTCTGTCGGCACGAGTCTCGG
AS_European_sdY        CGAATACTTTATCTGAGATTTACGTGGTTTTCTGTCGGCACGAGTCTCGG
AS_Tasmanian_Ssa06_sdY  CGAATACTTTATCTGAGATTTACGTGGTTTTCTGTCGGCACGAGTCTCGG
Chinook_sdY          CAGATGCTTTATCTGAGATTGATGTGTCTTTCT-----GTCTCGG
RT_sdY            CGGAAGCTTTATCTGAGATTGATGTGTCTTTCT-----GTCTCGG
*  *  *****  *  **  *****  *****

```

```

BT_sdY          -----
AS_Tasmanian_Ssa02_sdY  TCAAATTTAATTTGGAAGGGTAAGGACGTATGGTGGG-----G
AS_Tasmanian_Ssa03_sdY  TCAAATTTAATTTGGAAGGGTAAGGACGTATGGTGGG-----G
AS_European_sdY        TCAAATTTAATTTGGAAGGGTAAGGACGTATGGTGGG-----G
AS_Tasmanian_Ssa06_sdY  TCAAATTTAATTTGGAAGGGTAAGGACGTATGGTGGG-----G
Chinook_sdY          TCAAATTTAATTTGGA--GGTACG---GTGGGGTGGGCCCGCCAAAACCA
RT_sdY            TCAAATTTAATTTGGATGGGCAAG---GTGGGGTGGGCCACCAAACCA

```

```

BT_sdY          -----
AS_Tasmanian_Ssa02_sdY  CGGGCCCTGCATTAAC TACAACAGTTATGATAACATTATGTTTTCTCCA
AS_Tasmanian_Ssa03_sdY  CGGGCCCTGCATTAAC TACAACAGTTATGATAACATTATGTTTTCTCCA
AS_European_sdY        CGGGCCCTGCATTAAC TACAACAGTTATGATAACATTATGTTTTCTCCA
AS_Tasmanian_Ssa06_sdY  CGGGCCCTGCATTAAC TACAACAGTTATGATAACATTATGTTTTCTCCA
Chinook_sdY          CAGGGCCCTGCATTAAC TACAACAGTTATGATAACATTACATTTCTCTA
RT_sdY            CAGGGCCCTGCATTAAC TACAACAGTTATGATAACATTACATTTCTCTA

```



```

BT_sdY -----
AS_Tasmanian_Ssa02_sdY TTTTCCTGTAATTTTC-----
AS_Tasmanian_Ssa03_sdY TTTTCCTGTAATTTTC-----
AS_European_sdY TTTTCCTGTAATTTTC-----
AS_Tasmanian_Ssa06_sdY TTTTCCTGTAATTTTC-----
Chinook_sdY TATTACTGTAATTTTCCACCATACAGTGCATTTCGGAAAATATTCAGACCC
RT_sdY TATTACTGTAATTTTCCACCATACAGTGCATTTCGGAAAGTATTCAAACCC

```

```

BT_sdY -----
AS_Tasmanian_Ssa02_sdY -----GTTACAGCCTCATTCTAAAATTGAT
AS_Tasmanian_Ssa03_sdY -----GTTACAGCCTTATTCTAAAATTGAT
AS_European_sdY -----GTTACAGCCTTATTCTAAAATTGAT
AS_Tasmanian_Ssa06_sdY -----GTTACAGCCTTATTCTAAAATTGAT
Chinook_sdY ATTCCCTTTTCCCACATTTTGTTATGCTACAGCCTTATTCTTATATTGAT
RT_sdY ATTCCCTTTTCCCACATTTTGTTATGCTACAGCCTTATTCTAATATTGAT

```

```

BT_sdY -----
AS_Tasmanian_Ssa02_sdY TAAATAAATGTTTTTCCTCATCAATCTACACACAATACCTTATAATGGTA
AS_Tasmanian_Ssa03_sdY TAAATAAATGTTTTTCCTCATCAATCTACACACAATACCTTATAATGGTA
AS_European_sdY TAAATAAATGTTTTTCCTCATCAATCTACACACAATACCTTATAATGGTA
AS_Tasmanian_Ssa06_sdY TAAATAAATGTTTTTCCTCATCAATCTACACACAATACCTTATAATGGTA
Chinook_sdY TAAAT---CGGTTTTTCCTCATCAATCTACACACAATACCCCATAAATGACA
RT_sdY TAAAT---CGTTTTTCCTCATCAATCTACACACAATACCCCATAAATGACA

```

```

BT_sdY -----
AS_Tasmanian_Ssa02_sdY TATATAACAGATTTAAAGATTTTTTACAAATGT-----ATAAAAAAAT
AS_Tasmanian_Ssa03_sdY TATATAACAGATTTAAAGATTTTTTACAAATGT-----ATAAAAAAAT
AS_European_sdY TATATAACAGATTTAAAGATTTTTTACAAATGT-----ATAAAAAAAT
AS_Tasmanian_Ssa06_sdY TATATAACAGATTTAAAGATTTTTTACAAATGT-----ATAAAAAAAT
Chinook_sdY -----AGGTGAAAACAGTTTTTAAGAAAGTTTTGCTGATTAAAAAAC
RT_sdY -----AGGTGAAAACAGTTTTTAAGAAAGTTTTGCTGATTAAAAAAC

```

```

BT_sdY -----
AS_Tasmanian_Ssa02_sdY GT-----TTATTTACATAAGTATTTAGACCCTTTGCTAT
AS_Tasmanian_Ssa03_sdY GT-----TTATTTACATAAGTATTTAGACCCTTTGCTAT
AS_European_sdY GT-----TTATTTACATAAGTATTTAGACCCTTTGCTAT
AS_Tasmanian_Ssa06_sdY GT-----TTATTTACATAAGTATTTAGACCCTTTGCTAT
Chinook_sdY ATCAACAACCTATATATCTTATTTACATAAGATTTTCAGACCCTTTGCTAT
RT_sdY ATCAACAACCTATACATCTTATTTACATAAGATTTTCAGACCCTTTGCTAT

```

```

BT_sdY -----
AS_Tasmanian_Ssa02_sdY GAAACTCGAAATTAAGCTCAGCTGCATCCGGTTTC--CATTGATAATATT
AS_Tasmanian_Ssa03_sdY GAAACTCGAAATTAAGCTCAGCTGCATCCGGTTTC--CATTGATAATATT
AS_European_sdY GAAACTCGAAATTAAGCTCAGCTGCATCCGGTTTC--CATTGATAATATT
AS_Tasmanian_Ssa06_sdY GAAACTCGAAATTAAGCTCAGCTGCATCCGGTTTC--CATTGATAATATT
Chinook_sdY GAGAATCAAAATTAATATCAGCAGAATCCGGTTTCTGCTTTGATAATATT
RT_sdY GAGAATCAAAATTAATCTCAGCAGAATCCGGTTTC--CATTGATAATATT

```

---Exon 3-4

```
BT_sdY -----
AS_Tasmanian_Ssa02_sdY TGAGATGTTTCTACAACCTTGATTGGAGTCCACCTCTGGTAAATTCAATTT
AS_Tasmanian_Ssa03_sdY TGAGATGTTTCTACAACCTTGATTGGAGTCCACCTCTGGTAAATTCAATTT
AS_European_sdY TGAGATGTTTCTACAACCTTGATTGGAGTCCACCTCTGGTAAATTCAATTT
AS_Tasmanian_Ssa06_sdY TGAGATGTTTCTACAACCTTGATTGGAGTCCACCTCTGGTAAATTCAATTT
Chinook_sdY TTAGATGTTTCTACAACCTTGAGTGGAGTCCACCTGTGGTGGATTCAATTC
RT_sdY TTAGATGTTTCTACAACCTTGAGTGGAGTCCACCTGTGGTAGATTAAATTC
```

F2a----->

```
BT_sdY -----
AS_Tasmanian_Ssa02_sdY A-TGGGACATGATTTGGAAAGGCACACTCCTGTCTATATAAGGTCCCACA
AS_Tasmanian_Ssa03_sdY A-TGGGACATGATTTGGAAAGGCACACTCCTGTCTATATAAGGTCCCACA
AS_European_sdY A-TGGGACATGATTTGGAAAGGCACACTCCTGTCTATATAAGGTCCCACA
AS_Tasmanian_Ssa06_sdY A-TGGGACATGATTTGGAAAGGCACACTCCTGTCTATATAAGGTCCCACA
Chinook_sdY ATTGGGGCATGATATTGAAAGGCACACACCTGTCTATAACAAGGTCCCACA
RT_sdY ATTGGGGCATGATATTGAAAGGCACACACCTGTCTATAACAAGGTCCCACA
```

```
BT_sdY -----
AS_Tasmanian_Ssa02_sdY GTTGACAGTGCATTTTCAGAGCAAAAACCAAGTCATGAGGGCAAAGGAATT
AS_Tasmanian_Ssa03_sdY GTTGACAGTGCATTTTCAGAGCAAAAACCAAGTCATGAGGGCAAAGGAATT
AS_European_sdY GTTGACAGTGCATTTTCAGAGCAAAAACCAAGTCATGAGGGCAAAGGAATT
AS_Tasmanian_Ssa06_sdY GTTGACAGTGCATTTTCAGAGCAAAAACCAAGTCATGAGGGCAAAGGAATT
Chinook_sdY GTTGACAGTGCATGTCAGGGCAAAAACAAAGCCATGAGATTGAAAGAATT
RT_sdY GTTGACAGTGCATGTCAGGGCAAAAACCAAGCCATGAGATTGAAAGAATT
```

```
BT_sdY -----
AS_Tasmanian_Ssa02_sdY ATCCGTAGGGCTCCAAAACAGGATTGTGTATAGGCACAGATCAGGGGAAG
AS_Tasmanian_Ssa03_sdY ATCCGTAGAGCTCCAAAACAGGATTGTGTATAGGCACAGATCAGGGGAAG
AS_European_sdY ATCCGTAGAGCTCCAAAACAGGATTGTGTATAGGCACAGATCAGGGGAAG
AS_Tasmanian_Ssa06_sdY ATCCGTAGAGCTCCAAAACAGGATTGTGTATAGGCACAGATCAGGGGAAG
Chinook_sdY ATCCG-----AAACAAGATTGTGTTGAGGCACAGATC-TGGGAAG
RT_sdY ATCCG-----AAACAAGATTGTGTTGAGGCACAGATC-TGGGAAG
```

```
BT_sdY -----
AS_Tasmanian_Ssa02_sdY GGTACCAAACATTTCTGAAGCATTGAAGGTCCCCAAGAACACAGTGGTC
AS_Tasmanian_Ssa03_sdY GGTACCAAACATTTCTGAAGCATTGAAGGTCCCCAAGAACACAGTGGTC
AS_European_sdY GGTACCAAACATTTCTGAAGCATTGAAGGTCCCCAAGAACACAGTGGTC
AS_Tasmanian_Ssa06_sdY GGTACCAAACATTTCTGAAGCATTGAAGGTCCCCAAGAACACAGTGGTC
Chinook_sdY GGTACCAAACATTTCTGAAGCATTGAAGGTCCCCAAGA--TCAGTGGTC
RT_sdY GGTACCAAACGTTTCTGAA-----CCCCAAGA--TCAATGGTC
```

```
BT_sdY -----
AS_Tasmanian_Ssa02_sdY TCCATCATTCTTAAATGGAAGAAGTCTGGAAACACCAAGATTCTTCCTAG
AS_Tasmanian_Ssa03_sdY TCCATCATTCTTAAATGGAAGAAGTTTGGAAACACCAAGATTCTTCCTAG
AS_European_sdY TCCATCATTCTTAAATGGAAGAAGTTTGGAAACACCAAGATTCTTCCTAG
AS_Tasmanian_Ssa06_sdY TCCATCATTCTTAAATGGAAGAAGTTTGGAAACACCAAGATTCTTCCTAG
Chinook_sdY TCCATCATTCTGAAATGGAAGAAGTTTGGAAACCACCGAAACTCATCCTAG
RT_sdY TCCATCATTCTGAAATGGAAGAAGTTTGGAAACCCTGAAACTCATCCTAG
```

```
BT_sdY -----
AS_Tasmanian_Ssa02_sdY AGCTGGCCACCCG-----
AS_Tasmanian_Ssa03_sdY AGCTGGCCACCCG-----
AS_European_sdY AGCTGGCCACCCG-----
AS_Tasmanian_Ssa06_sdY AGCTGGCCACCCG-----
Chinook_sdY AGTTGGCCGCCAGAGCTGGACTCCTGAGTGGAGCAGTGGTCTAAGGCAC
RT_sdY AGTTGGCCGCCCA-----GAGCAGCGGTCTAAGGCAC
```

```
BT_sdY -----
AS_Tasmanian_Ssa02_sdY -----
AS_Tasmanian_Ssa03_sdY -----
AS_European_sdY -----
AS_Tasmanian_Ssa06_sdY -----
Chinook_sdY TGCATCTTAGTGCTAGATTGGTCACTACAGTCCCGGTTTCGATCCCGGGC
RT_sdY TGCATCTCAGTGCTAGATTGGTCACTACAGTCCCGGTTTCGATCCCGGGC
```

```
BT_sdY -----
AS_Tasmanian_Ssa02_sdY -----
AS_Tasmanian_Ssa03_sdY -----
AS_European_sdY -----
AS_Tasmanian_Ssa06_sdY -----
Chinook_sdY TGTATCACAACCGGTCGTGATTTGGAGTCCCATAGGGCGCCGTACAATTT
RT_sdY TGTATCACAACCGGTCGTGATTTGGAGTCCCATAGGGCGGCGTACAATTT
```

```

BT_sdY -----GCCAAACTGA
AS_Tasmanian_Ssa02_sdY -----GCCAACCTGA
AS_Tasmanian_Ssa03_sdY -----GCCAACCTGA
AS_European_sdY -----GCCAACCTGA
AS_Tasmanian_Ssa06_sdY -----GCCAACCTGA
Chinook_sdY GGCCCAGCGTCGTCCGGGTTAGGGGAGGCCGGGGAGGCCGTCATTGTAA
RT_sdY GGCCCAGCGTTGTCCGGGTTAGGGGAGGCCGGGGAGGCCGTCATTGTAA
* ** * *

```

```

BT_sdY GCA-----
AS_Tasmanian_Ssa02_sdY GCA-----
AS_Tasmanian_Ssa03_sdY GCA-----
AS_European_sdY GCA-----
AS_Tasmanian_Ssa06_sdY GCA-----
Chinook_sdY GCAAGAATTTGTTTTTATATGACTTGCCTAGTTAAATAATGGTTAA--AT
RT_sdY ACAAGAATTTGTTTTTATATTACTTGCCTAGTTAAATAATGGCTAAATAT
**

```

```

BT_sdY -----ATCGGGGAGAAGGGCCTTGGTCATGGAGGTGAT
AS_Tasmanian_Ssa02_sdY -----ATCGGGGAGAAGGGCCTTGGTCAGGGAGGTGAT
AS_Tasmanian_Ssa03_sdY -----ATCGGGGAGAAGGGCCTTGGTCAGGGAGGTGAT
AS_European_sdY -----ATCGGGGAGAAGGGCCTTGGTCAGGGAGGTGAT
AS_Tasmanian_Ssa06_sdY -----ATCGGGGAGAAGGGCCTTGGTCAGGGAGGTGAT
Chinook_sdY ATATTTATTTTTTATTATCAGGGGAGAAGGGCCTTGGTCAGGGAGGTGAC
RT_sdY ATATTTATTTTTTATTATCAGGGGAGAAGGGCCTTGGTCAGGGAGGTGAC
*** *****

```

BT\_sdY CAAGAACCCGATTGTCAATCGGACAGAGCTCCAGAGTTCCTCTGTGGAGA  
AS\_Tasmanian\_Ssa02\_sdY CAAGAACCCGATTGTCAATCGGACAGAGCTCCAGAGTTCCTCTGTGGAGA  
AS\_Tasmanian\_Ssa03\_sdY CAAGAACCCGATTGTCAATCGGACAGAGCTCCAGAGTTCCTCTGTGGAGA  
AS\_European\_sdY CAAGAACCCGATTGTCAATCGGACAGAGCTCCAGAGTTCCTCTGTGGAGA  
AS\_Tasmanian\_Ssa06\_sdY CAAGAACCCGATTGTCAATCGGACAGAGCTCCAGAGTTCCTCTGTGGAGA  
Chinook\_sdY CAATAACCTGATGGTCACTCTGACATAGCTCCAAAGTTCCTCTGTGGAAA  
RT\_sdY CAATAACCTGATGGTC-CTCTGACATAGCTCCAAAGTTCCTCTGTGGAGA  
\*\*\* \*\*

BT\_sdY TGGGAGAACCTTCCAGAAGGACAACCATCTCTGCAGCACTCCACCAATCA  
AS\_Tasmanian\_Ssa02\_sdY TGGGAGAACCTTCCAGAAGGACAACCATCTCTGCAGCACTCCACCAATCA  
AS\_Tasmanian\_Ssa03\_sdY TGGGAGAACCTTCCAGAAGGACAACCATCTCTGCAGCACTCCACCAATCA  
AS\_European\_sdY TGGGAGAACCTTCCAGAAGGACAACCATCTCTGCAGCACTCCACCAATCA  
AS\_Tasmanian\_Ssa06\_sdY TGGGAGAACCTTCCAGAAGGACAACCATCTCTGCAGCACTCCACCAATCA  
Chinook\_sdY TGGGAGAATCTTCCAGAATGACAGCCATCTCTGCAACACTCCAATAATCA  
RT\_sdY TGGGAGAATCTTCCAGAATGACAGCCATCTCTGCAGCACTCCACTAATCA  
\*\*\*\*\* \*\*

BT\_sdY GGCCTTTATGGTAGAGTGTCCAGACGGAAGCCACTCCTCAGTAAAAGGCA  
AS\_Tasmanian\_Ssa02\_sdY GGCCTTCATGGTAGAGTGTCCAGACGGGAGCCACTCCTCAGTAAAAGGCA  
AS\_Tasmanian\_Ssa03\_sdY GGCCTTCATGGTAGAGTGTCCAGACGGGAGCCACTCCTCAGTAAAAGGCA  
AS\_European\_sdY GGCCTTCATGGTAGAGTGTCCAGACGGGAGCCACTCCTCAGTAAAAGGCA  
AS\_Tasmanian\_Ssa06\_sdY GGCCTTCATGGTAGAGTGTCCAGACGGGAGCCACTCCTCAGTAAAAGGCA  
Chinook\_sdY GGCCTTTATAGTAGAGTGGCCAGACGGAAGCCACTCCTCAGTAAAAGGCA  
RT\_sdY GGCCTTTTTTGGTAGAGTGGCCAGACGGAAGCCACTCCTCAGTAAAAGGCA  
\*\*\*\*\* \*

BT\_sdY CATGACAGCCCGCTTGTAGTTTGC AAAAGGAACCTAAAGGACTCTCAGA  
AS\_Tasmanian\_Ssa02\_sdY CATGACAGCCCTCTTGTAGTTTGC AAAAGGAACCTAAAGGACTCTCAGA  
AS\_Tasmanian\_Ssa03\_sdY CATGACAGCCCGCTTGTAGTTTGC AAAAGGAATCTAAAGGACTCTCAGA  
AS\_European\_sdY CATGACAGCCCGCTTGTAGTTTGC AAAAGGAACCTAAAGGACTCTCAGA  
AS\_Tasmanian\_Ssa06\_sdY CATGACAGCCCTCTTGTAGTTTGC AAAAGGAACCTAAAGGACTCTCAGA  
Chinook\_sdY CATGACAGCCC ACTTGGAGTTTGC AAAAGGAACATAAAGCACTCTCAGA  
RT\_sdY CATGACAGCCC ACTTGGAGTTTGC AAAAGGAACATAAAGCACTCTCAGA  
\*\*\*\*\* \*\*

BT\_sdY CCATGAGAAACAAGATTCTCTTGTCTGAATAAACCAAGATTGAACACTTT  
AS\_Tasmanian\_Ssa02\_sdY CCATGAGAAACAAGATTCTCTTGTCTGAATAAACCAAGATTGAACACTTT  
AS\_Tasmanian\_Ssa03\_sdY CCATGAGAAACAAGATTCTCTTGTCTGAATAAACCAAGATTGAACACTTT  
AS\_European\_sdY CCATGAGAAACAAGATTCTCTTGTCTGAATAAACCAAGATTGAACACTTT  
AS\_Tasmanian\_Ssa06\_sdY CCATGAGAAACAAGATTCTCTTGTCTGAATAAACCAAGATTGAACACTTT  
Chinook\_sdY CCATGAGAAACAAGATTCTCTGCTCTGATTTAATCAAGATTTAACTCTAT  
RT\_sdY CCATGAGAAACAAGATTCTCTGCTCTGATTTAATCAAGATTTAACTCTAT  
\*\*\*\*\* \* \*\*

BT\_sdY GGCCT-GAATGCCAAGTGTACATCTGGAGGAAAGCTGGCACCATCCCTA  
AS\_Tasmanian\_Ssa02\_sdY GGCCT-GAATGCCAAGTGTACATCTGGAGGAAAGCTGGCACCATCCCTA  
AS\_Tasmanian\_Ssa03\_sdY GGCCT-GAATGCCAAGTGTACATCTGGAGGAAAGCTGGCACCATCCCTA  
AS\_European\_sdY GGCCT-GAATGCCAAGTGTACATCTGGAGGAAAGCTGGCACCATCCCTA  
AS\_Tasmanian\_Ssa06\_sdY GGCCT-GAATGCCAAGTGTACATCTGGAGGAAAGCTGGCACCATCCCTA  
Chinook\_sdY GGCCT-AAATTACAAGCGTACATCTGGTGGAAAGCTGGCACCATCCCTG  
RT\_sdY GGCCTAAAATTACAAGCGTACATCTGGTGGAAAGCTGGCACCATCCCTA  
\*\*\*\*\* \*\*



BT\_sdY CAGTGAAGCATGGTGGGAGCAGCATCATGCTGTGGGGATGTTTTTCAGCG  
AS\_Tasmanian\_Ssa02\_sdY CGGTGAAGCATGGTGGGGGCAGCATCATGCTGTGGGGATGTTTTTCAGCG  
AS\_Tasmanian\_Ssa03\_sdY CAGTGAAGCATGGTGGGGGCAGCATCATGCTGCGGGGATGTTTTTCAGCG  
AS\_European\_sdY CAGTGAAGCATGGTGGGGGCAGCATCATGCTGTGGGGATGTTTTTCAGCG  
AS\_Tasmanian\_Ssa06\_sdY CGGTGAAGCATGGTGGGGGCAGCATCATGCTGTGGGGATGTTTTTCAGCG  
Chinook\_sdY TGA-----  
RT\_sdY TGA-----

BT\_sdY GCAGGGACTGGGATCGAGGGAAAGATTAACAGAGCAAAGTACAGAGAGAT  
AS\_Tasmanian\_Ssa02\_sdY GCAGGGACTGGGATCGAGGGAAAGATTAACAGAGCAAAGTACAGAGAGAT  
AS\_Tasmanian\_Ssa03\_sdY GCAGGGACTGGGATCGAGGGAAAGATTAACAGAGCAAAGTACGGAGAGAT  
AS\_European\_sdY GCAGGGACTGGGATCGAGGGAAAGATTAACAGAGCAAAGTACAGAGAGAT  
AS\_Tasmanian\_Ssa06\_sdY GCAGGGACTGGGATCGAGGGAAAGATTAACAGAGCAAAGTACAGAGAGAT  
Chinook\_sdY -----  
RT\_sdY -----

BT\_sdY TCTTGATCCAGAGCGCTCAGGACCTCAGACTGGGGCTAAGGTTACCTTC  
AS\_Tasmanian\_Ssa02\_sdY TCTTGATCCAGAGCGCTCAGGACCTCAGACTGGGGCTAAGGTTACCTTC  
AS\_Tasmanian\_Ssa03\_sdY TCTTGATCCAGAGCGCTCAGGACCTCAGACTGGGGCTAAGGTTTACCTTC  
AS\_European\_sdY TCTTGATCCAGAGCGCTCAGGACCTCAGACTGGGGCTAAGGTTACCTTC  
AS\_Tasmanian\_Ssa06\_sdY TCTTGATCCAGAGCGCTCAGGACCTCAGACTGGGGCTAAGGTTACCTTC  
Chinook\_sdY -----  
RT\_sdY -----

BT\_sdY CAACAGGACAACGACCGTAAACACACAGCCAAGAAAACGCAGGAGTGGCT  
AS\_Tasmanian\_Ssa02\_sdY CAACAGGACAACGACCGTAAACACACAGCCAAGACAACGCAGGAGTGGCT  
AS\_Tasmanian\_Ssa03\_sdY CAACAGGACGACGACCGTAAACACACAGCCAAGACAACGCAGGAGTGGCT  
AS\_European\_sdY CAACAGGACAACGACCGTAAACACACAGCCAAGACAACGCAGGAGTGGCT  
AS\_Tasmanian\_Ssa06\_sdY CAACAGGACAACGACCGTAAACACACAGCCAAGACAACGCAGGAGTGGCT  
Chinook\_sdY -----  
RT\_sdY -----

BT\_sdY TCGGGACAAGTCTCTGAATTTTCATTCACGAGCACGGACTTGAACCCGATC  
AS\_Tasmanian\_Ssa02\_sdY TCAGGACAAGTCTCTGAATTTTCATTCATGAGCACGGACTTGAACCCGATC  
AS\_Tasmanian\_Ssa03\_sdY TCAGGACAAGTCTCTGAATTTTCATTCATGAGCACGGACTTGAACCCGATC  
AS\_European\_sdY TCAGGACAAGTCTCTGAATTTTCATTCATGAGCACGGACTTGAACCCGATC  
AS\_Tasmanian\_Ssa06\_sdY TCAGGACAAGTCTCTGAATTTTCATTCATGAGCACGGACTTGAACCCGATC  
Chinook\_sdY -----  
RT\_sdY -----

BT\_sdY TAACATCTCTGTAGAGACCTGAAAATAGCTGTGCAGCGACATTTCCCATC  
AS\_Tasmanian\_Ssa02\_sdY TAACATCTCTGTAGAGACCTGAAAATAGCTGTGCAGCGACATTTCCCATT  
AS\_Tasmanian\_Ssa03\_sdY TAACATCTCTGTAGAGACCTGAAAATAGCTGTGCAGCGACATTTCCCATT  
AS\_European\_sdY TAACATCTCTGTAGAGACCTGAAAATAGCTGTGCAGCGACATTTCCCATT  
AS\_Tasmanian\_Ssa06\_sdY TAACATCTCTGTAGAGACCTGAAAATAGCTGTGCAGCGACATTTCCCATT  
Chinook\_sdY -----  
RT\_sdY -----

BT\_sdY CAACCTGACAGAGCTTGAGAGGATCTGCAGAGAATAATGAGAGAAACTCC  
AS\_Tasmanian\_Ssa02\_sdY CAACCTGACAGAGCTTGAGAGGATCTGCAGAGAAGAATGAGAGAAACTCC  
AS\_Tasmanian\_Ssa03\_sdY CAACCTGACAGAGCTTGAGAGGATCTGCAGAGAAGAATGAGAGAAACTCC  
AS\_European\_sdY CAACCTGACAGAGCTTGAGAGGATCTGCAGAGAAGAATGAGAGAAACTCC  
AS\_Tasmanian\_Ssa06\_sdY CAACCTGACAGAGCTTGAGAGGATCTGCAGAGAAGAATGAGAGAAACTCC  
Chinook\_sdY -----  
RT\_sdY -----

BT\_sdY CCAAATACAGGTGTGCCAAGCTTGTAGCGTCATACCCAAGAAGACTCGAT  
AS\_Tasmanian\_Ssa02\_sdY CCAAATACAGGTGTGCCAAGCTTGTAGCGTCATACCCAAGAAGACTTGTAT  
AS\_Tasmanian\_Ssa03\_sdY CCAAATACAGGTGTGCCAAGCTTGTAGCGTCATACCCAAGAAGACTTGTAT  
AS\_European\_sdY CCAAATACAGGTGTGCCAAGCTTGTAGCGTCATACCCAAGAAGACTTGTAT  
AS\_Tasmanian\_Ssa06\_sdY CCAAATACAGGTGTGCCAAGCTTGTAGCGTCATACCCAAGAAGACTTGTAT  
Chinook\_sdY -----  
RT\_sdY -----

BT\_sdY GCTGTAATCGCTGCCAAAGGTGTTTCAACAAAGTACTGAGTAAAGGGTCT  
AS\_Tasmanian\_Ssa02\_sdY GCTGTAATCGCTGCCAAAGGTGCTTCAACAAAGTACTGAGTAAAGGGTCT  
AS\_Tasmanian\_Ssa03\_sdY GCTGTAATCGCTGCCAAAGGTGCTTCAACAAAGTACTGAGTAAAGGGTCT  
AS\_European\_sdY GCTGTAATCGCTGCCAAAGGTGCTTCAACAAAGTACTGAGTAAAGGGTCT  
AS\_Tasmanian\_Ssa06\_sdY GCTGTAATCGCTGCCAAAGGTGCTTCAACAAAGTACTGAGTAAAGGGTCT  
Chinook\_sdY -----T  
RT\_sdY -----T  
\*

```

BT_sdY      GAATACTTATCTAAATGTGATATTTTC-----CGTTTTAA----AT-
AS_Tasmanian_Ssa02_sdY  GAATACTTATCTAAATGTGATATTTTC-----CGTTTTAA----AT-
AS_Tasmanian_Ssa03_sdY  GAATACTTATCTAAATGTGATATTTTC-----CGTTTTAA----AT-
AS_European_sdY        GAATACTTATCTAAATGTGATATTTTC-----CGTTTTAA----AT-
AS_Tasmanian_Ssa06_sdY  GAATACTTATCTAAATGTGATATTTTC-----CGTTTTAA----AT-
Chinook_sdY           GAATACTCATGTAAATGTAATATTTCAATTTTTTTTTTATTTCATTTTTTT-
RT_sdY              GAATACTCATGTAAATGTAATATTTCAAAAACAAATATTTCAA----ATG
*****  ** ***** *****                               *** **      *

```

```

BT_sdY      TTGTAAT--GAATTGGCTAATATTTCTAAAAACCTGTTTTTGCTTTGTCA
AS_Tasmanian_Ssa02_sdY  TTGTAAT--GAATTGGCTAATATTTCTAAAAACCTGTTTTTGCTTTGTCA
AS_Tasmanian_Ssa03_sdY  TTGTAAT--GAATTGGCTAATATTTCTAAAAACCTGTTTTTGCTTTGTCA
AS_European_sdY        TTGTAAT--GAATTGGCTAATATTTCTAAAAACCTGTTTTTGCTTTGTCA
AS_Tasmanian_Ssa06_sdY  TTGTAAT--GAATTGGCTAATATTTCTAAAAACCTGTTTTTGCTTTGTCA
Chinook_sdY           TTTAAAT--AAATTGGCTAATATTTCTACACACCTGTTTTTTCTTTGTCA
RT_sdY              TTTTAATAGAAATTGGCTAATATTTCTACACACCTGTTTTTTCTTTGTCA
**   ***   ***** * ***** *****

```

```

BT_sdY      TTATGGGGTATTGTGTGTAGATAATGA-GGGAAAAAACTATTTAATCCA
AS_Tasmanian_Ssa02_sdY  TTATGGGGTA-TGTGTGTAGATTAATGAGGGGAAAAAACTATTTAATCCA
AS_Tasmanian_Ssa03_sdY  TTATGGGGTA-TGTGTGTAGATTAATGAGGGGAAAAAAACAATTTAATCCA
AS_European_sdY        TTATGGGGTA-TGTGTGTAGATTAATGAGGGGAAAAAAACAATTTAATCCA
AS_Tasmanian_Ssa06_sdY  TTATGGGGTA-TGTGTGTAGATTAATGAGGGGAAAAAACTATTTAATCCA
Chinook_sdY           TTGTGGGGTATTGTGTGTAGATAATGA-GGGAAAAAGCAATTTAATCAA
RT_sdY              TTGTGGGGTATTGTGTGTAGATTAATGAGGGGAAAAGA-AATTTAATCAA
** ***** ***** ***** ***** ***** ***** *

```

BT\_sdY TTTTAGAATAAGGCTATAATGTAACAAAACGTGGAAAAAGTCAAGGGGTC  
AS\_Tasmanian\_Ssa02\_sdY TTTTAGAATAAGGCTATAATGTAACAAAACGTGGAAAAAGTCAAGGTGTC  
AS\_Tasmanian\_Ssa03\_sdY TTTTAGAATAAGGCTATAATGTAACAAAACGTGGAAAAAGTCAAGGTGTC  
AS\_European\_sdY TTTTAGAATAAGGCTATAATGTAACAAAACGTGGAAAAAGTCAAGGTGTC  
AS\_Tasmanian\_Ssa06\_sdY TTTTAGAATAAGGCTATAATGTAACAAAACGTGGAAAAAGTCAAGGTGTC  
Chinook\_sdY TTTTGGAATAATGCTGAAATGTAACACAATTTGGAAAATGTCAAGGAG--  
RT\_sdY TTTTGGAATAATGCTGAAATGTAACACAATTTGGAAAATGTCAAGGAGAC  
\*\*\*\*\* \*\*

BT\_sdY TGAATCCTTTCCCAATGCACTGTATATGTGTGAATGTGTATGAGGCATTA  
AS\_Tasmanian\_Ssa02\_sdY TGAATACTTTCCCAATGCACTGTATATGTGTGAATGTGTATGAGGCGTTA  
AS\_Tasmanian\_Ssa03\_sdY TGAATACTTTCCCAATGCACTGTATATGTGTGAATGTGTATGAGGCGTTA  
AS\_European\_sdY TGAATACTTTCCCAATGCACTGTATATGTGTGAATGTGTATGAGGCGTTA  
AS\_Tasmanian\_Ssa06\_sdY TGAATACTTTCCCAATGCACTGTATATGTGTGAATGTGTATGAGGCGTTA  
Chinook\_sdY -----ACTTTCCCAATGC-----ATATGTGTAAATGTGTATGGGGCCTTA  
RT\_sdY TGAATACTTTCCCAATGC-----ATATGTGTAAACGTGTATGGGGCCTTA  
\*\*\*\*\* \*\*

BT\_sdY CAGA-----GCCACTTGATGTTGATTATAATTAGATGTT-AACAATCCTT  
AS\_Tasmanian\_Ssa02\_sdY CAGA-----GCCACTTGATGTTGATTATAATTAGATGTT-CACAATCCTT  
AS\_Tasmanian\_Ssa03\_sdY CAGA-----GCCACTTGATGTTGATTATAATTAGATGTT-CACAATCCTT  
AS\_European\_sdY CAGA-----GCCACTTGATGTTGATTATAATTAGATGTT-CACAATCCTT  
AS\_Tasmanian\_Ssa06\_sdY CAGA-----GCCACTTGATGTTGATTATAATTAGATGTT-CACAATCCTT  
Chinook\_sdY CTTACTTACTCCACTTGGTGTGATTAT-----AATCTTT  
RT\_sdY CTTACTTACTCCACTTGGTGTGATTATAATTAGATGTTGAACAATCTTT  
\* \* \*\*\*\*\* \*\*

|                        |            |                                          |
|------------------------|------------|------------------------------------------|
|                        |            | exon4                                    |
| BT_sdY                 | CCTTCTCCAG | ATTAAATTGCCATGGGCTCAGCAGCTATTCAAGCAAGCTC |
| AS_Tasmanian_Ssa02_sdY | CCTTCTCCAG | ATTAAATTGCCATGGGCTCAGCAGCTATTCAAGCAAGCTC |
| AS_Tasmanian_Ssa03_sdY | CCTTCTCCAG | ATTAAATTGCCATGGGCTCAGCAGCTATTCAAGCAAGCTC |
| AS_European_sdY        | CCTTCTCCAG | ATTAAATTGCCATGGGCTCAGCAGCTATTCAAGCAAGCTC |
| AS_Tasmanian_Ssa06_sdY | CCTTCTCCAG | ATTAAATTGCCATGGGCTCAGCAGCTATTCAAGCAAGCTC |
| Chinook_sdY            | CCTTCTCCAG | ATTAAATTGCCATGGGCTCAGCAGCTATTCAAGGAAGTTC |
| RT_sdY                 | CCTTCTCCAG | ATTAAATTACCATGGGCCAGCAGCTATTCAAGGAAGTTC  |
|                        | *****      | ***** ***** ***** ***** ***** ** *       |

|                        |                                                    |       |
|------------------------|----------------------------------------------------|-------|
|                        |                                                    |       |
|                        | exon4                                              |       |
| BT_sdY                 | ACGACTTCAGGATCTGGCTTGAGTCCTCCCCTGTCTCTCCTGGAGTCTGA |       |
| AS_Tasmanian_Ssa02_sdY | ACGACTTCAGGATCTGGCTTGAGTCCTCCCCTGTCTCTCCTGGAGTCTGA |       |
| AS_Tasmanian_Ssa03_sdY | ACGACTTCAGGATCTGGCTTGAGTCCTCCCCTGTCTCTCCTGGAGTCTGA |       |
| AS_European_sdY        | ACGACTTCAGGATCTGGCTTGAGTCCTCCCCTGTCTCTCCTGGAGTCTGA |       |
| AS_Tasmanian_Ssa06_sdY | ACGACTTCAGGATCTGGCTTGAGTCCTCCCCTGTCTCTCCTGGAGTCTGA |       |
| Chinook_sdY            | ATGACTTCAGGATCTGGCTTGAGTCCTCCCCTGTCTCTCCTGGAGTCTGA |       |
| RT_sdY                 | ATGACTTCAGGATCTGGCTTGAGTCCTCCCCTGTCTCTCCTGGAGTCTGA |       |
|                        | *                                                  | ***** |

|                        |                                                         |
|------------------------|---------------------------------------------------------|
| BT_sdY                 | AAATATGGTTG--GTCCCAACAGGACTCCAATTGCTCCCAATATTAGCCT      |
| AS_Tasmanian_Ssa02_sdY | AAATATGGTTG--GTCCCAACAGGACTCCAATTGCTCCCAATATTAGCCT      |
| AS_Tasmanian_Ssa03_sdY | AAATATGGTTG--GTCCCAACAGGACTCCAATTGCTCCCAATATTAGCCT      |
| AS_European_sdY        | AAATATGGTTG--GTCCCAACAGGACTCCAATTGCTCCCAATATTAGCCT      |
| AS_Tasmanian_Ssa06_sdY | AAATATGGTTG--GTCCCAACAGGACTCCAATTGCTCCCAATATTAGCCT      |
| Chinook_sdY            | AGAACCGGTTGGAGTCCCAACAGGA-----CTCCCAATATGAGCCT          |
| RT_sdY                 | AGAACTGGTTGGAGTCCCAACAGGACCCCAACTGCTCCCAATATGAGCCT      |
|                        | * *        *****        *****        *****        ***** |



```

--sdY 3'UTR-----
BT_sdY -----
AS_Tasmanian_Ssa02_sdY -----
AS_Tasmanian_Ssa03_sdY -----
AS_European_sdY      AGACAATCAGCCAGTAAATAAA-----
AS_Tasmanian_Ssa06_sdY -----
Chinook_sdY          AGACATTCAGACAGTAAATTAATAAATACCCTTCAAATACATAATTTTAA
RT_sdY               AGACAATCAGACAGTAAATTAATAAATACCCTTCA-----

BT_sdY -----
AS_Tasmanian_Ssa02_sdY -----
AS_Tasmanian_Ssa03_sdY -----
AS_European_sdY -----
AS_Tasmanian_Ssa06_sdY -----
Chinook_sdY          TGTTGCTTTTTTGTCCATTCAGATTAATGCTTACTTCATGCTGTTTGT
RT_sdY -----

BT_sdY -----
AS_Tasmanian_Ssa02_sdY -----
AS_Tasmanian_Ssa03_sdY -----
AS_European_sdY -----
AS_Tasmanian_Ssa06_sdY -----
Chinook_sdY          CTGTTACAGTTG
RT_sdY -----

```

**Figure S1** CLUSTAL 2.1 multiple sequence alignment of sdY from brown trout (BT), three Tasmanian and one European Atlantic salmon, Chinook salmon and rainbow trout (RT). The boundaries of exons and locations of primers are shown.



sdY MADREARFQAQHSFLVSVEYCEEEVLSHEVMGSDVRIAYKPFSLMMDGIPVISLPPKPPDT  
AS\_Tasmanian\_Ssa02 MVDREARFQAQHSFLVSVEYCEEEVLSHEVMGSDVRIAYKPFSLMMDGIPVISLPPKPPDT  
AS\_Tasmanian\_Ssa03 MVDREARFQAQHSFLVSVEYCEEEVLSHEVMGSDVRIAYKPFSLMMDGIPVISLPPKPPDT  
AS\_European MVDREARFQAQHSFLVSVEYCEEEVLSHEVMGSDVRIAYKPFSLMMDGIPVISLPPKPPDT  
AS\_Tasmanian\_Ssa06 MVDREARFQAQHSFLVSVEYCEEEVLSHEVMGSDVRIAYKPFSLMMDGIPVISLPPKPPDT  
Chinook\_sdY MADREARIQAQHCFLVSVEYCEEEVLSHEVMGGDVRIAHKT-SLMMDGIPFISLPPKPPNT  
RT\_sdY MADREARIQAQHCFLVSVEYCEEEVLSHEVMGGDVRIAHKT-SLMMDGIPFISLPPKPPNT  
\* . \*\*\*\*\* : \*\*\*\*\* . \*\*\*\*\* : \*\*\*\*\* . \*\*\*\*\* : \*\*\*\*\* . \*\*\*\*\* : \*\*\*\*\* \*

BT\_sdY IPISDRSTLSNLLSLMEGGVVLSSREEGIYAERHSQAIVSWMGGTGDEMHVMERDVDPV  
AS\_Tasmanian\_Ssa02 IPISDRSILSNLLSLMEGGVVLSSKEEGIYAERHSQAIVSWMGGTGDEMHVMERDVDPV  
AS\_Tasmanian\_Ssa03 IPISDRSILSNLLSLMEGGVVLSSKEEGIYAERHSQAIVSWMGGTGDEMHVMERDVDPV  
AS\_European IPISDRSILSNLLSLMEGGVVLSSKEEGIYAERHSQAIVSWMGGTGDEMHVMERDVDPV  
AS\_Tasmanian\_Ssa06 IPISDRSILSNLLSLMEGGVVLSSKEEGIYAERHSQAIVSWMGGTGDEMHVMERDVDPV  
Chinook\_sdY LPISDRSILSNLLSLMEGGVVLSSREEGIYAERHSQATVSWMGGTGDEMHVMDRDVDPV  
RT\_sdY LPISDRSILSNLLSLMEGGVVLSSREEGIYAERHSQATVSWMGGTGDEMHVMERDVDPV  
: \*\*\*\*\* \*\*\*\*\* : \*\*\*\*\* \*\*\*\*\* : \*\*\*\*\*

BT\_sdY MLFNRETFRQELERFSRADGFQPQIGFSLWFGQDSSLSAPISISIKLPWAQQQLFKQAHDF  
AS\_Tasmanian\_Ssa02 MLFNRETFRQELERFSRADGFQPQIGFSLWFGQDSSLSAPISISIKLPWAQQQLFKQAHDF  
AS\_Tasmanian\_Ssa03 MLFNRETFRQELERFSRADGFQPQIGFSLWFGQDSSLSAPISISIKLPWAQQQLFKQAHDF  
AS\_European MLFNRETFRQELERFSRADGFQPQIGFSLWFGQDSSLSAPISISIKLPWAQQQLFKQAHDF  
AS\_Tasmanian\_Ssa06 MLFNRETFRQELERFSRADGFQPQIGFSLWFGQDSSLSAPISISIKLPWAQQQLFKQAHDF  
Chinook\_sdY MLFNRETFRQELERFARADGSQPQCGFSLWFGQDSSLSAPNFISIKLPWAQQQLFKEVHDF  
RT\_sdY MLFNREHFRQELDRFARADGSQPQCGFSLWFGQDSSLSAPIFISIKLPWAQQQLFKEVHDF  
\*\*\*\*\* \*\*\*\*\* : \*\* : \*\*\*\*\* \*\* \*\*\*\*\* \*\*\*\*\* : . \*\*\*

```
BT_sdY          RIWLESSPVSPGV
AS_Tasmanian_Ssa02  RIWLESSPVSPGV
AS_Tasmanian_Ssa03  RIWLESSPVSPGV
AS_European       RIWLESSPVSPGV
AS_Tasmanian_Ssa06  RIWLESSPVSPGV
Chinook_sdY       RIWLESSPVSPGV
RT_sdY           RIWLESSPVSPGV
*****
```

**Figure S2** CLUSTAL 2.1 multiple sequence alignment of sdY from brown trout (BT), three Tasmanian and one European Atlantic salmon, Chinook Ssalmon and rainbow trout (RT).



```

Atlantic Salmon Ctg_2  TTGT-TCTTAG--GCAAC-----GAATGG-AT-----CATTTCTAGTGA--
Rainbow Trout          TTGTATTTTAAACAGCAACAGTTCCAACCTAGACAGGTATATAAGGGTGTTTTAAATGAAA
Chinook Salmon        TTGTATTTTAAACAGCAACAGTTCCAACCTAGACAGGTATATAAGGGTGTTTTAAATGAAA
                        **** * **      *****                ** ** **          *** ** **

Atlantic Salmon Ctg_2  ---TATT-CAGAGCAT-----GGCTGTGATAAAATTACATGTGGGTGCATTAGGAAACAG
Rainbow Trout          ATATATTTCAAGGTATTTTCATTGTTTGTGTTGCATTTCTTG--GGGCATAAGGGCAATG
Chinook Salmon        ATATATTTCAAGGTATTTCACTGTTTGTGTTGCATTTCTT--GGGGCATAAGGGCAATG
                        **** * * * *      * ***** * ** * ** ***** ** * *

Atlantic Salmon Ctg_2  AGGGTGCACCCAAATGGA-----ACCCTATTC--GATATATAGTGCCT
Rainbow Trout          AAA-TGTACCAATATTGACATATAGTTGCACATTTTCTACGCTTGGCTCCAGGAAAAC
Chinook Salmon        AAAACGTACCAATATTGACATATAGTTGCATATTTTCTACGCTTGGCTCCAGGAAAAC
                        *   * ** * * * * *                **** * *   ** *

Atlantic Salmon Ctg_2  ATTTTTGGTTTA-----CAAAGAATTATAT-----TGTAGTGTCTTCTGT
Rainbow Trout          ATTTCTCATTTGGGTCCTAGGCTGAAAAAGTTTAAAGAACC---TGTAGTGTCTTCTGT
Chinook Salmon        ATTTCTCATTTGGGTCCTAGGCTGAAAAAGTTTAAAGAACCCTGCTGTAGTGTTTTCTGT
                        **** * **      *** **      ***** *****

Atlantic Salmon Ctg_2  CTTTATCCTGTCTGGTACAAGATAAAGTCTGCAAAGAGGAGGAGAAGGGAGAGAGAGTGA
Rainbow Trout          CTTTATCCTCCCTGGTACAAGATCAAGTCTGGAGAGAGGAG---AAGGGAGAGAG--TGA
Chinook Salmon        CTTTATCCTCCCTGGTACAAGATCAAGTCTGGAGAGTGGAG---AAGGGAGAGAGAGTGA
                        ***** ***** ***** * ** **** ***** ***** **

Atlantic Salmon Ctg_2  GCAAGGCCTTGGCCTTCACCTGACAAGAGAGGATTGAGAGAGAAACACTCCCCTTAACTA
Rainbow Trout          GCAAGGCCTTGGCCTTCACCTGACAAGAGAGGATTGAGAGAGAAACACTCCCCTTAACTA
Chinook Salmon        GCAAGGCCTTGGCCTTCACCTGACAAGAGAGGATTGAGAGAGAAACACTCCCCTTAACTA
                        *****

Atlantic Salmon Ctg_2  ATCATTTTACATGAAAAAATGCATATCAAAAACTCCAGCGCATGTTTAAAAACAGTCCTT
Rainbow Trout          ATACTTTTACATGAAAAACATGCTCATAAAAAACTCCAGCTCATGTTTAAAAAGCCGTCCTT
Chinook Salmon        ATACTTTTACATGAAAAACATGCACATAAAAAACTCCAGCTCATGTTTAAAAAGCCGTCCTT
                        ** ***** ** * ***** ***** * *****

| Exon 1
| ATGGCTGACAGAGAGGCCAGAATCCAAG
Atlantic Salmon Ctg_2  AGAGGTTTGAATCCACCTGCCCTTCAATGGTTGACAGAGAGGCCAGATTCCAAGGTACA
Rainbow Trout          AGAATATTTGAGTCCATCTGCCCTTCAATGGCTGACAGAGAGGCCAGAATCCAAGGTACA
Chinook Salmon        AGAATAGTTGAGTCCATCTGCCCTTCAATGGCTGACAGAGAGGCCAGAATCCAAGGTACA
                        *** ***** ***** ****

```

**Figure S3** CLUSTAL multiple sequence alignment by Kalign (2.0) of 5' sdY sequences of Atlantic salmon, rainbow trout and Chinook salmon.

**Table S1** Nucleotide sequences of primers and probes.

| Primer name          | Sequence 5' - 3'                            | Purpose                    |
|----------------------|---------------------------------------------|----------------------------|
| SDY exon1 F          | ATGGTTGACAGAGAGGCCAGA                       |                            |
| SDY exon 1 R         | CCATCATCAGGGAGAAGGGC                        |                            |
| SDY exon2 F probe    | TGATGGATGGGATCCCCGTCATCTCTCTCCCAAAG         |                            |
| SDY exon2 R          | TAGAGCTTAAAACCACTCCACCCTCCATGAGGGA          |                            |
| SDY exon3 F          | AGTTGGAACGCTTCAGCAGAGCAGATGG                |                            |
| SDY exon3 R          | AGATTGGTGCACTGAGTGATGAGTCTTGTC              |                            |
| SDY exon4 F probe    | GACTTCAGGATCTGGCTTGAGTCCTCCCCTGTCTCTCCTGGAG |                            |
| SDY exon4 R          | ATTTACTGGCTGATTGTCTTCTA                     |                            |
| Contig 2 FISH 858 F  | TGTGGGTGCATTAGGAAACA                        | cloning for FISH plasmid   |
| Contig 2 FISH 5976 R | GACTGTGGGGCTGAGACAAT                        | cloning for FISH plasmid   |
| Contig 2 6155 F      | GGTAGCACTTGTAGCCAGAC                        | male-female boundary check |
| Contig 2 6450 R      | TGGTGACATGGTGAGTAGTG                        | male-female boundary check |
| Contig 2 8297 F      | CTTAGAATGTTGGGTTGGAG                        | male-female boundary check |
| Contig 2 8473 R      | CATTCACAGATCCCAGTGC                         | male-female boundary check |
| Contig 2 14711 F     | GGCATGTTTGTACAAGAACC                        | male-female boundary check |
| Contig 2 15014 R     | ACAGGTGATGAAGTAAAAGC                        | male-female boundary check |
| Contig 2 18353 F     | GAATGCAGCTTTCTTACCTG                        | male-female boundary check |
| Contig 2 18680 R     | ATATGGTATGACCCAACCAG                        | male-female boundary check |
| Contig 1 95417 F     | ATTGAACAGGTTACCAGGTG                        | male-female boundary check |
| Contig 1 95712 R     | TCCTCACTCACACAAGACAA                        | male-female boundary check |
| Contig 1 86142 F     | GATGCTGGGTAAGTCTGAAG                        | male-female boundary check |
| Contig 1 86552 R     | CCATTTCTCCAGGTAACCTA                        | male-female boundary check |

|                          |                                        |                            |
|--------------------------|----------------------------------------|----------------------------|
| Contig 1 42083 F         | AGGGAACCGTTGATCTACTT                   | male-female boundary check |
| Contig 1 42446 R         | TACTGCACATTCTGGTGAAA                   | male-female boundary check |
| Contig 1 12665 F         | AGAAATGTGGAGCAAGAAGA                   | microsatellite marker      |
| Contig 1 12947 R         | TGTAAAACGACGGCCAGTTGTGTATGCGTTTACTGCTT | microsatellite marker      |
| Exon 1 F                 | ATGGTTGACAGAGAGGCCAGA                  | sequencing primer          |
| Exon 1 R                 | CCATCATCAGGGAGAAGGGC                   | sequencing primer          |
| Exon 2 F                 | CCCAGCACTCTTTTCTTGTCTC                 | sequencing primer          |
| Exon 2 R                 | CCTGTCTGAAGGTCTCCCTG                   | sequencing primer          |
| Exon 3 R                 | AGATTGGTGCACTGAGTGATGAGTCTT            | sequencing primer          |
| Exon 3 F                 | AGTTGGAACHCTTCGCCAGAGCAGATGG           | sequencing primer          |
| Exon 3-4 F2a             | AAATTCAATTTATGGGACATG                  | sequencing primer          |
| sdY 3' UTR R (Exon 4 R)  | ATTTACTGGCTGATTGTCTTCTA                | sequencing primer          |
| sdY 5' UTR F (Exon 1 F)  | AGAGTGAGCAAGGCCTTGG                    | sequencing primer          |
| Salmon & BT 10bp gap R   | GTCCGCCTATGGAAATCAATTG                 | sequencing primer          |
| sdY Exon 3-intron-end F2 | TATGAACACAACCAGTCATGATG                | sequencing primer          |
