# Supplementary material for: Genomic Instability of the Sex-Determining Locus in Atlantic Salmon (Salmo salar)
Source: PubMed Central journal article supplement (PMC4632069; doi:10.1534/g3.115.020115), 2015-09-22
Supplement: supp_g3.115.020115_FigureS2.pdf [file supp_g3.115.020115_FigureS2.pdf]

```
BT_sdY          RIWLESSPVSPGV
AS_Tasmanian_Ssa02  RIWLESSPVSPGV
AS_Tasmanian_Ssa03  RIWLESSPVSPGV
AS_European       RIWLESSPVSPGV
AS_Tasmanian_Ssa06  RIWLESSPVSPGV
Chinook_sdY       RIWLESSPVSPGV
RT_sdY           RIWLESSPVSPGV
*****
```

**Figure S2** CLUSTAL 2.1 multiple sequence alignment of sdY from brown trout (BT), three Tasmanian and one European Atlantic salmon, Chinook Ssalmon and rainbow trout (RT).
