# Supplementary material for: Genomic Instability of the Sex-Determining Locus in Atlantic Salmon (Salmo salar)
Source: PubMed Central journal article supplement (PMC4632069; doi:10.1534/g3.115.020115), 2015-09-22
Supplement: supp_g3.115.020115_FigureS3.pdf [file supp_g3.115.020115_FigureS3.pdf]

```

Atlantic Salmon Ctg_2  TTGT-TCTTAG--GCAAC-----GAATGG-AT-----CATTTCTAGTGA--
Rainbow Trout          TTGTATTTTAACAGCAACAGTTCCAACCTAGACAGGTATATAAGGGTGTTTTAAATGAAA
Chinook Salmon        TTGTATTTTAACAGCAACAGTTCCAACCTAGACAGGTATATAAGGGTGTTTTAAATGAAA
                        **** * **      *****                ** ** **          *** ** **

Atlantic Salmon Ctg_2  ---TATT-CAGAGCAT-----GGCTGTGATAAAATTACATGTGGGTGCATTAGGAAACAG
Rainbow Trout          ATATATTTCAAGGTATTTTCATTGTTTGTGTTGCATTTCTTG--GGGCATAAGGGCAATG
Chinook Salmon        ATATATTTCAAGGTATTTTCACCTGTTTGTGTTGCATTTCTT--GGGGCATAAGGGCAATG
                        **** * * * *      * ***** * ** * ** ***** ** * *

Atlantic Salmon Ctg_2  AGGGTGCACCCAAATGGA-----ACCCTATTC--GATATATAGTGCCT
Rainbow Trout          AAA-TGTACCAATATTTGACATATAGTTGCACATTTTCTACGCTTGGCTCCAGGAAAAC
Chinook Salmon        AAAACGTACCAATATTTGACATATAGTTGCATATTTTCTACGCTTGGCTCCAGGAAAAC
                        *   * ** * * * * *                **** * *   ** *

Atlantic Salmon Ctg_2  ATTTTTGGTTTA-----CAAAGAATTATAT-----TGTAGTGTCTTCTGT
Rainbow Trout          ATTTCTCATTGGGTCCTAGGCTGAAAAAGTTTAAGAACC-----TGTAGTGTCTTCTGT
Chinook Salmon        ATTTCTCATTGGGTCCTAGGCTGAAAAAGTTTAAGAACCCTGCTGTAGTGTTTTCTGT
                        **** * **      *** **      ***** *****

Atlantic Salmon Ctg_2  CTTTATCCTGTCTGGTACAAGATAAAGTCTGCAAAGAGGAGGAGAAGGGAGAGAGAGTGA
Rainbow Trout          CTTTATCCTCCCTGGTACAAGATCAAGTCTGGAGAGAGGAG---AAGGGAGAGAG--TGA
Chinook Salmon        CTTTATCCTCCCTGGTACAAGATCAAGTCTGGAGAGTGGAG---AAGGGAGAGAGAGTGA
                        ***** ***** ***** * ** **** ***** ***** **

Atlantic Salmon Ctg_2  GCAAGGCCTTGGCCTTCACCTGACAAGAGAGGATTGAGAGAGAAACACTCCCCTTAACTA
Rainbow Trout          GCAAGGCCTTGGCCTTCACCTGACAAGAGAGGATTGAGAGAGAAACACTCCCCTTAACTA
Chinook Salmon        GCAAGGCCTTGGCCTTCACCTGACAAGAGAGGATTGAGAGAGAAACACTCCCCTTAACTA
                        *****

Atlantic Salmon Ctg_2  ATCATTTTACATGAAAAAATGCATATCAAAAACTCCAGCGCATGTTTAAAAACAGTCCTT
Rainbow Trout          ATACTTTTACATGAAAAACATGCTCATAAAAACTCCAGCTCATGTTTAAAAAGCCGTCCTT
Chinook Salmon        ATACTTTTACATGAAAAACATGCACATAAAAACTCCAGCTCATGTTTAAAAAGCCGTCCTT
                        ** ***** ** * ***** ***** ***** * *****

| Exon 1
| ATGGCTGACAGAGAGGCCAGAATCCAAG
Atlantic Salmon Ctg_2  AGAGGTTTGAATCCACCTGCCCTTCAATGGTTGACAGAGAGGCCAGATTCCAAGGTACA
Rainbow Trout          AGAATATTTGAGTCCATCTGCCCTTCAATGGCTGACAGAGAGGCCAGAATCCAAGGTACA
Chinook Salmon        AGAATAGTTGAGTCCATCTGCCCTTCAATGGCTGACAGAGAGGCCAGAATCCAAGGTACA
                        *** ***** ***** ****

```

**Figure S3** CLUSTAL multiple sequence alignment by Kalign (2.0) of 5' sdY sequences of Atlantic salmon, rainbow trout and Chinook salmon.
