# Supplementary material for: Genomic Instability of the Sex-Determining Locus in Atlantic Salmon (Salmo salar)
Source: PubMed Central journal article supplement (PMC4632069; doi:10.1534/g3.115.020115), 2015-09-22
Supplement: supp_g3.115.020115_TableS1.pdf [file supp_g3.115.020115_TableS1.pdf]

**Table S1** Nucleotide sequences of primers and probes.

| Primer name          | Sequence 5' - 3'                            | Purpose                    |
|----------------------|---------------------------------------------|----------------------------|
| SDY exon1 F          | ATGGTTGACAGAGAGGCCAGA                       |                            |
| SDY exon 1 R         | CCATCATCAGGGAGAAGGGC                        |                            |
| SDY exon2 F probe    | TGATGGATGGGATCCCCGTCATCTCTCTCCCAAAG         |                            |
| SDY exon2 R          | TAGAGCTTAAAACCACTCCACCCTCCATGAGGGA          |                            |
| SDY exon3 F          | AGTTGGAACGCTTCAGCAGAGCAGATGG                |                            |
| SDY exon3 R          | AGATTGGTGCACTGAGTGATGAGTCTTGTC              |                            |
| SDY exon4 F probe    | GACTTCAGGATCTGGCTTGAGTCCTCCCCTGTCTCTCCTGGAG |                            |
| SDY exon4 R          | ATTTACTGGCTGATTGTCTTCTA                     |                            |
| Contig 2 FISH 858 F  | TGTGGGTGCATTAGGAAACA                        | cloning for FISH plasmid   |
| Contig 2 FISH 5976 R | GACTGTGGGGCTGAGACAAT                        | cloning for FISH plasmid   |
| Contig 2 6155 F      | GGTAGCACTTGTAGCCAGAC                        | male-female boundary check |
| Contig 2 6450 R      | TGGTGACATGGTGAGTAGTG                        | male-female boundary check |
| Contig 2 8297 F      | CTTAGAATGTTGGGTTGGAG                        | male-female boundary check |
| Contig 2 8473 R      | CATTCACAGATCCCAGTGC                         | male-female boundary check |
| Contig 2 14711 F     | GGCATGTTTGTACAAGAACC                        | male-female boundary check |
| Contig 2 15014 R     | ACAGGTGATGAAGTAAAAGC                        | male-female boundary check |
| Contig 2 18353 F     | GAATGCAGCTTTCTTACCTG                        | male-female boundary check |
| Contig 2 18680 R     | ATATGGTATGACCCAACCAG                        | male-female boundary check |
| Contig 1 95417 F     | ATTGAACAGGTTACCAGGTG                        | male-female boundary check |
| Contig 1 95712 R     | TCCTCACTCACACAAGACAA                        | male-female boundary check |
| Contig 1 86142 F     | GATGCTGGGTAAGTCTGAAG                        | male-female boundary check |
| Contig 1 86552 R     | CCATTTCTCCAGGTAACCTA                        | male-female boundary check |

|                          |                                        |                            |
|--------------------------|----------------------------------------|----------------------------|
| Contig 1 42083 F         | AGGGAACCGTTGATCTACTT                   | male-female boundary check |
| Contig 1 42446 R         | TACTGCACATTCTGGTGAAA                   | male-female boundary check |
| Contig 1 12665 F         | AGAAATGTGGAGCAAGAAGA                   | microsatellite marker      |
| Contig 1 12947 R         | TGTAAAACGACGGCCAGTTGTGTATGCGTTTACTGCTT | microsatellite marker      |
| Exon 1 F                 | ATGGTTGACAGAGAGGCCAGA                  | sequencing primer          |
| Exon 1 R                 | CCATCATCAGGGAGAAGGGC                   | sequencing primer          |
| Exon 2 F                 | CCCAGCACTCTTTTCTTGTCTC                 | sequencing primer          |
| Exon 2 R                 | CCTGTCTGAAGGTCTCCCTG                   | sequencing primer          |
| Exon 3 R                 | AGATTGGTGCACTGAGTGATGAGTCTT            | sequencing primer          |
| Exon 3 F                 | AGTTGGAACHCTTCGCCAGAGCAGATGG           | sequencing primer          |
| Exon 3-4 F2a             | AAATTCAATTTATGGGACATG                  | sequencing primer          |
| sdY 3' UTR R (Exon 4 R)  | ATTTACTGGCTGATTGTCTTCTA                | sequencing primer          |
| sdY 5' UTR F (Exon 1 F)  | AGAGTGAGCAAGGCCTTGG                    | sequencing primer          |
| Salmon & BT 10bp gap R   | GTCCGCCTATGGAAATCAATTG                 | sequencing primer          |
| sdY Exon 3-intron-end F2 | TATGAACACAACCAGTCATGATG                | sequencing primer          |
